# Supplementary material
Source: PubMed Central journal article supplement (PMC7992505)
Supplement: NIHMS1678537-supplement-32341579_Supplementary_Tables_1-5.pdf [file NIHMS1678537-supplement-32341579_Supplementary_Tables_1-5.pdf]

In the format provided by the authors and unedited.

# Locoregionally administered B7-H3-targeted CAR T cells for treatment of atypical teratoid/rhabdoid tumors

Johanna Theruvath<sup>1</sup>, Elena Sotillo<sup>1</sup>, Christopher W. Mount<sup>2</sup>, Claus Moritz Graefl, Alberto Delaidelli<sup>3</sup>, Sabine Heitzeneder<sup>1</sup>, Louai Labanieh<sup>1,4</sup>, Shaurya Dhingra<sup>1</sup>, Amaury Leruste<sup>1</sup>, Robbie G. Majzner<sup>1,5</sup>, Peng Xu<sup>1</sup>, Sabine Mueller<sup>6,7,8</sup>, Derek W. Yecies <sup>9</sup>, Martina A. Finetti <sup>10</sup>, Daniel Williamson<sup>10</sup>, Pascal D. Johann<sup>11,12,13</sup>, Marcel Kool<sup>11,12</sup>, Stefan Pfister<sup>11,12,13</sup>, Martin Hasselblatt<sup>14</sup>, Michael C. Frühwald<sup>15,16</sup>, Olivier Delattre<sup>17,18</sup>, Didier Surdez <sup>17,18</sup>, Franck Bourdeaut<sup>17,18</sup>, Stephanie Puget<sup>19</sup>, Sakina Zaidi <sup>17,18</sup>, Siddhartha S. Mitra <sup>20</sup>, Samuel Cheshier<sup>21</sup>, Poul H. Sorensen<sup>3</sup>, Michelle Monje <sup>1,2,5,9,22,23</sup> and Crystal L. Mackall <sup>1,5,24</sup> ✉

<sup>1</sup>Department of Pediatrics, Stanford University School of Medicine, Stanford, CA, USA. <sup>2</sup>Department of Neurology, Stanford University School of Medicine, Stanford, CA, USA. <sup>3</sup>Department of Molecular Oncology, British Columbia Cancer Research Centre, Vancouver, British Columbia, Canada. <sup>4</sup>Department of Bioengineering, Stanford University, Stanford, CA, USA. <sup>5</sup>Stanford Cancer Institute, Stanford University School of Medicine, Stanford, CA, USA. <sup>6</sup>Department of Neurology, University of California San Francisco, San Francisco, CA, USA. <sup>7</sup>Department of Neurological Surgery, University of California San Francisco, San Francisco, CA, USA. <sup>8</sup>Department of Pediatrics, University of California San Francisco, San Francisco, CA, USA. <sup>9</sup>Department of Neurosurgery, Stanford University School of Medicine, Stanford, CA, USA. <sup>10</sup>Wolfson Childhood Cancer Research Centre, Northern Institute for Cancer Research, Newcastle University, Newcastle upon Tyne, UK. <sup>11</sup>Hopp Children's Cancer Center Heidelberg, Heidelberg, Germany. <sup>12</sup>Division of Pediatric Neurooncology, German Cancer Research Center and German Cancer Consortium, Heidelberg, Germany. <sup>13</sup>Department of Pediatric Hematology and Oncology, Heidelberg University Hospital, Heidelberg, Germany. <sup>14</sup>Institute of Neuropathology, Münster University Hospital, Münster, Germany. <sup>15</sup>University Children's Hospital Augsburg, Swabian Children's Cancer Center, Augsburg, Germany. <sup>16</sup>EU-RHAB Registry Center, Augsburg, Germany. <sup>17</sup>Paris Sciences Lettres Research University, INSERM U830, Paris, France. <sup>18</sup>Paris Sciences Lettres Research University, SIREDO: Care, Innovation and Research for Children, Adolescents and Young Adults with Cancer, Institut Curie, Paris, France. <sup>19</sup>Paris University, Necker-Enfants Malades Hospital, Department of Neurosurgery, Assistance Publique-Hôpitaux de Paris, Paris, France. <sup>20</sup>Pediatrics, University of Colorado Anschutz Medical Campus, Aurora, CO, USA. <sup>21</sup>Division of Pediatric Neurosurgery, Department of Neurosurgery, Primary Children's Hospital and Huntsman Cancer Institute, University of Utah, Salt Lake City, UT, USA. <sup>22</sup>Department of Pathology, Stanford University School of Medicine, Stanford, CA, USA. <sup>23</sup>Stanford Institute for Stem Cell and Regenerative Medicine, Stanford University School of Medicine, Stanford, CA, USA. <sup>24</sup>Department of Medicine, Stanford University School of Medicine, Stanford, CA, USA. ✉e-mail: [cmackall@stanford.edu](mailto:cmackall@stanford.edu)

| <b>Supplementary Table S1 Characteristics of ATRT cohort</b> |            |                                 |                            |                 |                                     |                      |
|--------------------------------------------------------------|------------|---------------------------------|----------------------------|-----------------|-------------------------------------|----------------------|
| <b>ATRT#</b>                                                 | <b>Sex</b> | <b>Age at diagnosis (years)</b> | <b>Tumor location</b>      | <b>Subgroup</b> | <b>Outcome (Survival in months)</b> | <b>B7-H3 H Score</b> |
| 1                                                            | M          | 3                               | Parieto-Occipital          | N/A             | 10                                  | 270                  |
| 2                                                            | M          | 1                               | Medulla                    | SHH             | 10                                  | 270                  |
| 3                                                            | M          | 1                               | frontal                    | N/A             | 5                                   | 285                  |
| 4                                                            | F          | 1                               | 4th ventricle              | N/A             | 2                                   | 297                  |
| 5                                                            | M          | 15                              | spinal cord                | N/A             | 22                                  | 285                  |
| 6                                                            | F          | 1                               | posterior fossa            | TYR             | alive                               | 240                  |
| 7                                                            | M          | 3                               | posterior fossa            | SHH             | alive                               | 270                  |
| 8                                                            | M          | 0                               | cerebellum                 | TYR             | 3                                   | 285                  |
| 9                                                            | F          | 3                               | frontal                    | SHH             | 14                                  | 270                  |
| 10                                                           | F          | 1                               | frontal                    | SHH             | alive                               | 270                  |
| 11                                                           | F          | 5                               | frontal                    | MYC             | 21                                  | 270                  |
| 12                                                           | M          | 0                               | Posterior Fossa            | N/A             | alive                               | 100                  |
| 13                                                           | M          | 4                               | Left Lateral Ventricle     | SHH             | 13                                  | 105                  |
| 14                                                           | F          | 0                               | Right parietal tumor       | SHH             | 17                                  | 150                  |
| 15                                                           | M          | 1                               | Posterior Fossa            | TYR             | 19                                  | 240                  |
| 16                                                           | F          | 5                               | Posterior Fossa            | TYR             | 6                                   | 240                  |
| 17                                                           | M          | 1                               | Right fronto-parietal      | SHH             | alive                               | 270                  |
| 18                                                           | F          | 1                               | Right Infratentorial Tumor | N/A             | 16                                  | 270                  |
| 19                                                           | M          | 3                               | Posterior Fossa            | N/A             | 11                                  | 285                  |
| 20                                                           | F          | 4                               | supratentorial             | MYC             | alive                               | 105                  |
| 21                                                           | M          | 0                               | infratentorial             | SHH             | 7                                   | 165                  |
| 22                                                           | M          | 0                               | infratentorial             | SHH             | 1                                   | 150                  |
| 23                                                           | F          | 0                               | infratentorial             | TYR             | 4                                   | 240                  |
| 24                                                           | F          | 0                               | supratentorial             | SHH             | 11                                  | 285                  |

|    |   |    |                |     |       |     |
|----|---|----|----------------|-----|-------|-----|
| 25 | M | 1  | infratentorial | TYR | 16    | 270 |
| 26 | F | 1  | supratentorial | MYC | alive | 270 |
| 27 | M | 0  | infratentorial | TYR | 9     | 255 |
| 28 | M | 5  | supratentorial | TYR | alive | 80  |
| 29 | F | 1  | supratentorial | MYC | 2     | 270 |
| 30 | M | 2  | supratentorial | SHH | alive | 255 |
| 31 | M | 1  | supratentorial | MYC | alive | 225 |
| 32 | M | 0  | infratentorial | TYR | 14    | 240 |
| 33 | M | 1  | infratentorial | TYR | alive | 285 |
| 34 | M | 3  | supratentorial | SHH | alive | 285 |
| 35 | F | 0  | infratentorial | TYR | 7     | 285 |
| 36 | F | 0  | infratentorial | TYR | 9     | 120 |
| 37 | M | 1  | infratentorial | TYR | alive | 210 |
| 38 | M | 0  | infratentorial | MYC | 0     | 150 |
| 39 | M | 2  | supratentorial | SHH | alive | 90  |
| 40 | F | 1  | supratentorial | MYC | 1     | 100 |
| 41 | F | 13 | supratentorial | N/A | 6     | 180 |
| 42 | M | 1  | supratentorial | SHH | alive | 240 |
| 43 | M | 1  | supratentorial | SHH | 12    | 285 |
| 44 | F | 0  | infratentorial | MYC | 11    | 240 |
| 45 | M | 1  | supratentorial | MYC | alive | 180 |
| 46 | M | 13 | supratentorial | MYC | alive | 270 |
| 47 | F | 5  | spinal         | MYC | 2     | 285 |

| <b>Supplementary Table S2 Summary of ATRT cohort</b>                                    |                |            |
|-----------------------------------------------------------------------------------------|----------------|------------|
| <b>Clinical features, molecular subgroup and outcome of AT/RT of cohort from Fig 1d</b> |                |            |
|                                                                                         |                |            |
| <b>Sex (N, %)</b>                                                                       | Male           | 28 (59.6%) |
|                                                                                         | Female         | 19 (40.4%) |
|                                                                                         |                |            |
| <b>Age at diagnosis (years) median (range)</b>                                          | 1              | (0-15)     |
| <b>Tumor location (Supratentorial, Infratentorial) N (%)</b>                            | Supratentorial | 23 (48.9%) |
|                                                                                         | Infratentorial | 24 (51.1%) |
|                                                                                         |                |            |
| <b>Subgroup N (%)</b>                                                                   |                |            |
| <b>TYR</b>                                                                              | 13             | 27.66%     |
| <b>SHH</b>                                                                              | 15             | 31.91%     |
| <b>MYC</b>                                                                              | 11             | 23.4%      |
| <b>N/A</b>                                                                              | 8              | 17.02%     |
| <b>Outcome (Survival in months) median (range)</b>                                      | 9.5            | (0-22)     |
| <b>B7-H3 H Score median (range)</b>                                                     | 255            | (80-297)   |

| <b>Supplementary Table S3 Characteristics of ATRT cell lines</b> |                           |            |                                                |
|------------------------------------------------------------------|---------------------------|------------|------------------------------------------------|
| <b>Cell lines</b>                                                | <b>Age at dx (months)</b> | <b>Sex</b> | <b>Tumor location</b>                          |
| <b>BT12</b>                                                      | 2                         | f          | Posterior-fossa                                |
| <b>BT16</b>                                                      | 2 years                   | m          |                                                |
| <b>ATRT13808</b>                                                 | 3 years                   | m          | Posterior fossa                                |
| <b>ATRT-CHB-1</b>                                                | 1 year                    | f          | Posterior-fossa                                |
| <b>CHLA 02</b>                                                   | 20                        | m          | Pineal Region (M0)                             |
| <b>CHLA 04</b>                                                   | 20                        | m          | Leptomeningeal spread                          |
| <b>CHLA 05</b>                                                   | 34                        | m          | Frontal Lobe (M3)                              |
| <b>CHLA 06</b>                                                   | 3                         | f          | Posterior fossa (M0)                           |
| <b>CHLA 266</b>                                                  | 1,5 years                 |            | Posterior fossa with supratentorial metastases |
| <b>VU 397</b>                                                    |                           |            |                                                |

| <b>Supplementary Table S4 Summary of pediatric normal brain cohort</b> |            |                    |
|------------------------------------------------------------------------|------------|--------------------|
| <b>Summary of pediatric normal brain cohort</b>                        |            |                    |
| <b>Age at sample harvest (years)</b>                                   | <b>Sex</b> | <b>B7-H3 Score</b> |
| 18                                                                     | f          | 6                  |
| 12                                                                     | f          | 17                 |
| 19                                                                     | m          | 33                 |
| 7                                                                      | f          | 23                 |
| 6                                                                      | f          | 7                  |
| 2                                                                      | m          | 0                  |
| 5                                                                      | f          | 0                  |
| 16                                                                     | m          | 20                 |
| 3                                                                      | f          | 2                  |
| 15                                                                     | m          | 2                  |
| 1                                                                      | f          | 30                 |
|                                                                        |            |                    |
| <b>Summary of Infant normal brain cohort (&lt; 1 years old)</b>        |            |                    |
| <b>Age at sample harvest (months)</b>                                  | <b>Sex</b> | <b>B7-H3 Score</b> |
| 1                                                                      | m          | 25                 |
| 1                                                                      | m          | 30                 |
| 2                                                                      | m          | 25                 |
| 2                                                                      | m          | 30                 |
| 3                                                                      | f          | 25                 |
| 4                                                                      | m          | 13                 |
| 6                                                                      | m          | 20                 |

| Supplementary Table S5 miRNA normalized counts |                |              |       |      |       |       |         |       |          |            |
|------------------------------------------------|----------------|--------------|-------|------|-------|-------|---------|-------|----------|------------|
| Accession #                                    | Probe Name     | Class Name   | BT12  | BT16 | CHAL6 | CHLA2 | CHLA266 | CHLA5 | NEUROD14 | NEUROINMAT |
| MIMAT0000062                                   | hsa-let-7a-5p  | Endogenous 1 | 10155 | 1917 | 5257  | 22630 | 2395    | 34232 | 1959     | 2314       |
| MIMAT0000063                                   | hsa-let-7b-5p  | Endogenous 1 | 2959  | 2699 | 887   | 10478 | 84      | 5287  | 112      | 6049       |
| MIMAT0000064                                   | hsa-let-7c-5p  | Endogenous 1 | 5465  | 318  | 645   | 5939  | 339     | 4057  | 1233     | 1324       |
| MIMAT0000065                                   | hsa-let-7d-5p  | Endogenous 1 | 2628  | 831  | 252   | 5004  | 57      | 2338  | 246      | 390        |
| MIMAT0000066                                   | hsa-let-7e-5p  | Endogenous 1 | 1390  | 85   | 453   | 1827  | 395     | 2202  | 911      | 271        |
| MIMAT0000067                                   | hsa-let-7f-5p  | Endogenous 1 | 748   | 62   | 94    | 876   | 58      | 636   | 92       | 22         |
| MIMAT00000414                                  | hsa-let-7g-5p  | Endogenous 1 | 3060  | 212  | 259   | 3636  | 67      | 2899  | 887      | 412        |
| MIMAT00000415                                  | hsa-let-7i-5p  | Endogenous 1 | 3926  | 225  | 122   | 3783  | 35      | 1266  | 483      | 329        |
| MIMAT00000416                                  | hsa-miR-1-3p   | Endogenous 1 | 20    | 32   | 20    | 20    | 30      | 20    | 29       | 20         |
| MIMAT0031892                                   | hsa-miR-1-5p   | Endogenous 1 | 29    | 39   | 24    | 34    | 41      | 32    | 20       | 20         |
| MIMAT0000098                                   | hsa-miR-100-5p | Endogenous 1 | 419   | 913  | 1836  | 4672  | 5375    | 7238  | 599      | 845        |
| MIMAT0000099                                   | hsa-miR-101-3p | Endogenous 1 | 21    | 20   | 28    | 20    | 27      | 20    | 44       | 20         |

|               |                               |              |     |     |      |      |      |      |      |      |
|---------------|-------------------------------|--------------|-----|-----|------|------|------|------|------|------|
| MIMAT0000101  | hsa-miR-103a-3p               | Endogenous 1 | 29  | 20  | 20   | 24   | 29   | 24   | 44   | 20   |
| MIMAT0000102  | hsa-miR-105-5p                | Endogenous 1 | 28  | 30  | 33   | 40   | 104  | 40   | 224  | 26   |
| MIMAT0000103  | hsa-miR-106a-5p+hsa-miR-17-5p | Endogenous 1 | 530 | 621 | 777  | 2333 | 4375 | 4101 | 6673 | 561  |
| MIMAT0000680  | hsa-miR-106b-5p               | Endogenous 1 | 329 | 105 | 2538 | 1107 | 1228 | 1371 | 5610 | 1268 |
| MIMAT0000104  | hsa-miR-107                   | Endogenous 1 | 276 | 25  | 303  | 1545 | 1740 | 1734 | 5578 | 53   |
| MIMAT0000253  | hsa-miR-10a-5p                | Endogenous 1 | 20  | 20  | 45   | 20   | 1426 | 20   | 20   | 20   |
| MIMAT0000254  | hsa-miR-10b-5p                | Endogenous 1 | 30  | 34  | 29   | 34   | 120  | 31   | 28   | 20   |
| MIMAT00005823 | hsa-miR-1178-3p               | Endogenous 1 | 22  | 34  | 31   | 25   | 29   | 20   | 20   | 20   |
| MIMAT00005825 | hsa-miR-1180-3p               | Endogenous 1 | 252 | 75  | 89   | 515  | 364  | 623  | 1113 | 244  |
| MIMAT00005828 | hsa-miR-1183                  | Endogenous 1 | 51  | 46  | 30   | 33   | 43   | 26   | 37   | 20   |
| MIMAT0022838  | hsa-miR-1185-1-3p             | Endogenous 1 | 22  | 44  | 20   | 22   | 24   | 26   | 29   | 22   |
| MIMAT0022713  | hsa-miR-1185-2-3p             | Endogenous 1 | 20  | 30  | 21   | 20   | 35   | 29   | 28   | 44   |
| MIMAT00005798 | hsa-miR-1185-5p               | Endogenous 1 | 77  | 36  | 23   | 22   | 38   | 31   | 39   | 28   |
| MIMAT0015049  | hsa-miR-1193                  | Endogenous 1 | 20  | 22  | 20   | 20   | 29   | 25   | 20   | 20   |
| MIMAT00005955 | hsa-miR-1197                  | Endogenous 1 | 70  | 52  | 40   | 46   | 66   | 51   | 129  | 56   |



|                  |                 |                 |    |    |     |    |     |     |      |     |
|------------------|-----------------|-----------------|----|----|-----|----|-----|-----|------|-----|
| MIMAT00058<br>63 | hsa-miR-1200    | Endogenous<br>1 | 20 | 30 | 20  | 23 | 38  | 20  | 20   | 20  |
| MIMAT00058<br>65 | hsa-miR-1202    | Endogenous<br>1 | 22 | 20 | 20  | 20 | 27  | 20  | 20   | 20  |
| MIMAT00058<br>66 | hsa-miR-1203    | Endogenous<br>1 | 20 | 35 | 23  | 34 | 30  | 22  | 20   | 20  |
| MIMAT00058<br>68 | hsa-miR-1204    | Endogenous<br>1 | 20 | 27 | 28  | 20 | 21  | 20  | 20   | 20  |
| MIMAT00058<br>69 | hsa-miR-1205    | Endogenous<br>1 | 20 | 20 | 20  | 23 | 34  | 28  | 20   | 20  |
| MIMAT00058<br>70 | hsa-miR-1206    | Endogenous<br>1 | 24 | 20 | 33  | 92 | 88  | 23  | 27   | 20  |
| MIMAT00004<br>21 | hsa-miR-122-5p  | Endogenous<br>1 | 27 | 20 | 20  | 20 | 20  | 20  | 20   | 20  |
| MIMAT00054<br>59 | hsa-miR-1224-3p | Endogenous<br>1 | 23 | 26 | 20  | 20 | 25  | 27  | 20   | 20  |
| MIMAT00054<br>58 | hsa-miR-1224-5p | Endogenous<br>1 | 20 | 23 | 20  | 20 | 20  | 20  | 20   | 20  |
| MIMAT00055<br>77 | hsa-miR-1226-3p | Endogenous<br>1 | 33 | 20 | 23  | 43 | 42  | 63  | 90   | 20  |
| MIMAT00055<br>83 | hsa-miR-1228-3p | Endogenous<br>1 | 36 | 50 | 29  | 25 | 53  | 43  | 33   | 22  |
| MIMAT00055<br>88 | hsa-miR-1233-3p | Endogenous<br>1 | 20 | 23 | 20  | 20 | 33  | 20  | 20   | 20  |
| MIMAT00055<br>89 | hsa-miR-1234-3p | Endogenous<br>1 | 34 | 27 | 161 | 80 | 117 | 51  | 45   | 318 |
| MIMAT00055<br>91 | hsa-miR-1236-3p | Endogenous<br>1 | 32 | 28 | 25  | 26 | 37  | 39  | 22   | 20  |
| MIMAT00004<br>22 | hsa-miR-124-3p  | Endogenous<br>1 | 20 | 22 | 27  | 48 | 93  | 202 | 2828 | 223 |

|                  |                  |                 |     |    |     |    |    |     |     |    |
|------------------|------------------|-----------------|-----|----|-----|----|----|-----|-----|----|
| MIMAT00058<br>96 | hsa-miR-1244     | Endogenous<br>1 | 20  | 20 | 69  | 24 | 29 | 20  | 20  | 20 |
| MIMAT00058<br>97 | hsa-miR-1245a    | Endogenous<br>1 | 23  | 30 | 20  | 20 | 32 | 24  | 20  | 20 |
| MIMAT00199<br>51 | hsa-miR-1245b-3p | Endogenous<br>1 | 20  | 30 | 20  | 20 | 27 | 20  | 20  | 22 |
| MIMAT00199<br>50 | hsa-miR-1245b-5p | Endogenous<br>1 | 30  | 38 | 20  | 63 | 60 | 54  | 20  | 20 |
| MIMAT00058<br>98 | hsa-miR-1246     | Endogenous<br>1 | 20  | 79 | 100 | 31 | 20 | 728 | 102 | 20 |
| MIMAT00058<br>99 | hsa-miR-1247-5p  | Endogenous<br>1 | 142 | 26 | 25  | 20 | 29 | 115 | 362 | 25 |
| MIMAT00059<br>00 | hsa-miR-1248     | Endogenous<br>1 | 21  | 32 | 23  | 21 | 32 | 20  | 20  | 27 |
| MIMAT00059<br>01 | hsa-miR-1249-3p  | Endogenous<br>1 | 25  | 36 | 20  | 21 | 41 | 36  | 39  | 20 |
| MIMAT00320<br>29 | hsa-miR-1249-5p  | Endogenous<br>1 | 20  | 20 | 20  | 20 | 20 | 20  | 20  | 20 |
| MIMAT00059<br>02 | hsa-miR-1250-5p  | Endogenous<br>1 | 20  | 21 | 30  | 20 | 27 | 21  | 20  | 20 |
| MIMAT00059<br>44 | hsa-miR-1252-5p  | Endogenous<br>1 | 20  | 20 | 20  | 20 | 20 | 20  | 20  | 20 |
| MIMAT00059<br>04 | hsa-miR-1253     | Endogenous<br>1 | 20  | 20 | 20  | 20 | 78 | 20  | 20  | 56 |
| MIMAT00059<br>05 | hsa-miR-1254     | Endogenous<br>1 | 24  | 22 | 20  | 20 | 30 | 25  | 20  | 20 |
| MIMAT00059<br>06 | hsa-miR-1255a    | Endogenous<br>1 | 28  | 45 | 30  | 35 | 55 | 50  | 36  | 26 |
| MIMAT00059<br>45 | hsa-miR-1255b-5p | Endogenous<br>1 | 33  | 51 | 28  | 35 | 40 | 48  | 27  | 25 |

|              |                 |              |       |      |      |       |       |       |       |       |
|--------------|-----------------|--------------|-------|------|------|-------|-------|-------|-------|-------|
| MIMAT0005908 | hsa-miR-1257    | Endogenous 1 | 32    | 39   | 41   | 41    | 59    | 43    | 26    | 25    |
| MIMAT0005909 | hsa-miR-1258    | Endogenous 1 | 37    | 22   | 31   | 29    | 56    | 29    | 29    | 20    |
| MIMAT0004602 | hsa-miR-125a-3p | Endogenous 1 | 32    | 20   | 21   | 29    | 49    | 41    | 56    | 43    |
| MIMAT0000443 | hsa-miR-125a-5p | Endogenous 1 | 5143  | 473  | 1278 | 7718  | 5911  | 8584  | 6784  | 2097  |
| MIMAT0000423 | hsa-miR-125b-5p | Endogenous 1 | 11741 | 2276 | 7861 | 57684 | 42251 | 47502 | 36774 | 35608 |
| MIMAT0000445 | hsa-miR-126-3p  | Endogenous 1 | 291   | 88   | 58   | 85    | 629   | 157   | 214   | 24    |
| MIMAT0005911 | hsa-miR-1260a   | Endogenous 1 | 636   | 31   | 3709 | 458   | 623   | 438   | 1693  | 917   |
| MIMAT0015041 | hsa-miR-1260b   | Endogenous 1 | 47    | 31   | 52   | 59    | 80    | 93    | 128   | 20    |
| MIMAT0005913 | hsa-miR-1261    | Endogenous 1 | 20    | 31   | 21   | 26    | 38    | 28    | 20    | 20    |
| MIMAT0005914 | hsa-miR-1262    | Endogenous 1 | 33    | 34   | 27   | 25    | 44    | 28    | 29    | 22    |
| MIMAT0005791 | hsa-miR-1264    | Endogenous 1 | 20    | 21   | 27   | 21    | 20    | 21    | 23    | 20    |
| MIMAT0005920 | hsa-miR-1266-5p | Endogenous 1 | 20    | 20   | 20   | 23    | 28    | 20    | 20    | 20    |
| MIMAT0005922 | hsa-miR-1268a   | Endogenous 1 | 21    | 46   | 22   | 30    | 39    | 26    | 20    | 20    |
| MIMAT0018925 | hsa-miR-1268b   | Endogenous 1 | 21    | 39   | 27   | 31    | 44    | 37    | 20    | 20    |
| MIMAT0005923 | hsa-miR-1269a   | Endogenous 1 | 20    | 22   | 20   | 23    | 31    | 38    | 100   | 20    |

|              |                  |              |      |    |    |    |    |     |     |      |
|--------------|------------------|--------------|------|----|----|----|----|-----|-----|------|
| MIMAT0019059 | hsa-miR-1269b    | Endogenous 1 | 20   | 32 | 20 | 26 | 23 | 20  | 45  | 20   |
| MIMAT0000446 | hsa-miR-127-3p   | Endogenous 1 | 2226 | 20 | 28 | 37 | 71 | 117 | 324 | 3114 |
| MIMAT0004604 | hsa-miR-127-5p   | Endogenous 1 | 25   | 21 | 20 | 20 | 26 | 20  | 20  | 48   |
| MIMAT0005924 | hsa-miR-1270     | Endogenous 1 | 28   | 42 | 30 | 66 | 35 | 66  | 38  | 20   |
| MIMAT0022712 | hsa-miR-1271-3p  | Endogenous 1 | 20   | 33 | 20 | 20 | 20 | 20  | 20  | 20   |
| MIMAT0005796 | hsa-miR-1271-5p  | Endogenous 1 | 24   | 39 | 28 | 42 | 48 | 56  | 71  | 24   |
| MIMAT0005925 | hsa-miR-1272     | Endogenous 1 | 24   | 20 | 30 | 30 | 32 | 21  | 20  | 20   |
| MIMAT0015017 | hsa-miR-1273c    | Endogenous 1 | 20   | 20 | 20 | 20 | 20 | 20  | 20  | 20   |
| MIMAT0005929 | hsa-miR-1275     | Endogenous 1 | 22   | 20 | 20 | 27 | 29 | 29  | 21  | 20   |
| MIMAT0005930 | hsa-miR-1276     | Endogenous 1 | 28   | 26 | 20 | 78 | 51 | 57  | 27  | 34   |
| MIMAT0005933 | hsa-miR-1277-3p  | Endogenous 1 | 31   | 37 | 21 | 33 | 33 | 22  | 67  | 20   |
| MIMAT0005936 | hsa-miR-1278     | Endogenous 1 | 21   | 26 | 20 | 20 | 48 | 22  | 20  | 20   |
| MIMAT0005937 | hsa-miR-1279     | Endogenous 1 | 28   | 20 | 20 | 26 | 39 | 31  | 20  | 20   |
| MIMAT0026477 | hsa-miR-128-1-5p | Endogenous 1 | 25   | 20 | 29 | 23 | 42 | 28  | 20  | 49   |
| MIMAT0031095 | hsa-miR-128-2-5p | Endogenous 1 | 21   | 25 | 20 | 20 | 20 | 20  | 20  | 20   |

|                  |                  |                 |    |     |    |     |     |     |     |     |
|------------------|------------------|-----------------|----|-----|----|-----|-----|-----|-----|-----|
| MIMAT00004<br>24 | hsa-miR-128-3p   | Endogenous<br>1 | 20 | 20  | 20 | 155 | 269 | 237 | 584 | 20  |
| MIMAT00059<br>39 | hsa-miR-1281     | Endogenous<br>1 | 26 | 30  | 23 | 22  | 36  | 31  | 23  | 20  |
| MIMAT00057<br>99 | hsa-miR-1283     | Endogenous<br>1 | 20 | 20  | 20 | 20  | 20  | 20  | 20  | 20  |
| MIMAT00058<br>76 | hsa-miR-1285-3p  | Endogenous<br>1 | 20 | 25  | 20 | 20  | 25  | 21  | 20  | 27  |
| MIMAT00227<br>19 | hsa-miR-1285-5p  | Endogenous<br>1 | 48 | 77  | 62 | 92  | 84  | 135 | 73  | 149 |
| MIMAT00058<br>77 | hsa-miR-1286     | Endogenous<br>1 | 31 | 45  | 25 | 20  | 31  | 35  | 37  | 20  |
| MIMAT00267<br>38 | hsa-miR-1287-3p  | Endogenous<br>1 | 22 | 20  | 21 | 22  | 25  | 20  | 30  | 20  |
| MIMAT00058<br>78 | hsa-miR-1287-5p  | Endogenous<br>1 | 26 | 20  | 20 | 21  | 37  | 28  | 85  | 24  |
| MIMAT00059<br>42 | hsa-miR-1288-3p  | Endogenous<br>1 | 20 | 20  | 20 | 20  | 20  | 20  | 20  | 20  |
| MIMAT00058<br>79 | hsa-miR-1289     | Endogenous<br>1 | 20 | 20  | 20 | 20  | 26  | 20  | 20  | 20  |
| MIMAT00046<br>05 | hsa-miR-129-2-3p | Endogenous<br>1 | 20 | 22  | 39 | 159 | 79  | 71  | 498 | 20  |
| MIMAT00002<br>42 | hsa-miR-129-5p   | Endogenous<br>1 | 20 | 22  | 20 | 37  | 24  | 24  | 99  | 20  |
| MIMAT00058<br>80 | hsa-miR-1290     | Endogenous<br>1 | 97 | 153 | 41 | 222 | 377 | 156 | 76  | 78  |
| MIMAT00058<br>81 | hsa-miR-1291     | Endogenous<br>1 | 20 | 31  | 20 | 20  | 32  | 20  | 20  | 36  |
| MIMAT00058<br>83 | hsa-miR-1293     | Endogenous<br>1 | 20 | 20  | 22 | 20  | 29  | 20  | 20  | 20  |

|                  |                 |                 |     |    |    |     |    |     |     |    |
|------------------|-----------------|-----------------|-----|----|----|-----|----|-----|-----|----|
| MIMAT00058<br>85 | hsa-miR-1295a   | Endogenous<br>1 | 23  | 51 | 38 | 35  | 51 | 51  | 36  | 20 |
| MIMAT00266<br>37 | hsa-miR-1296-3p | Endogenous<br>1 | 42  | 59 | 44 | 43  | 43 | 51  | 39  | 20 |
| MIMAT00057<br>94 | hsa-miR-1296-5p | Endogenous<br>1 | 20  | 42 | 89 | 32  | 57 | 69  | 217 | 33 |
| MIMAT00058<br>86 | hsa-miR-1297    | Endogenous<br>1 | 28  | 55 | 32 | 52  | 72 | 68  | 30  | 23 |
| MIMAT00058<br>00 | hsa-miR-1298-5p | Endogenous<br>1 | 22  | 29 | 38 | 34  | 43 | 42  | 211 | 20 |
| MIMAT00058<br>87 | hsa-miR-1299    | Endogenous<br>1 | 30  | 41 | 25 | 20  | 38 | 28  | 20  | 20 |
| MIMAT00057<br>97 | hsa-miR-1301-3p | Endogenous<br>1 | 20  | 21 | 21 | 27  | 40 | 54  | 85  | 20 |
| MIMAT00058<br>90 | hsa-miR-1302    | Endogenous<br>1 | 20  | 25 | 20 | 20  | 23 | 20  | 20  | 20 |
| MIMAT00058<br>91 | hsa-miR-1303    | Endogenous<br>1 | 20  | 37 | 20 | 30  | 20 | 32  | 20  | 20 |
| MIMAT00227<br>20 | hsa-miR-1304-3p | Endogenous<br>1 | 20  | 20 | 20 | 20  | 22 | 20  | 20  | 20 |
| MIMAT00058<br>92 | hsa-miR-1304-5p | Endogenous<br>1 | 20  | 20 | 20 | 23  | 31 | 21  | 20  | 20 |
| MIMAT00058<br>93 | hsa-miR-1305    | Endogenous<br>1 | 40  | 82 | 52 | 42  | 95 | 63  | 60  | 38 |
| MIMAT00059<br>50 | hsa-miR-1306-3p | Endogenous<br>1 | 29  | 49 | 23 | 27  | 31 | 27  | 27  | 20 |
| MIMAT00227<br>26 | hsa-miR-1306-5p | Endogenous<br>1 | 36  | 34 | 43 | 156 | 73 | 212 | 226 | 32 |
| MIMAT00059<br>51 | hsa-miR-1307-3p | Endogenous<br>1 | 137 | 40 | 36 | 64  | 57 | 78  | 51  | 20 |

|                  |                                |                 |      |     |       |      |       |           |       |      |
|------------------|--------------------------------|-----------------|------|-----|-------|------|-------|-----------|-------|------|
| MIMAT00227<br>27 | hsa-miR-1307-5p                | Endogenous<br>1 | 20   | 35  | 39    | 25   | 36    | 31        | 21    | 24   |
| MIMAT00004<br>25 | hsa-miR-130a-3p                | Endogenous<br>1 | 2856 | 133 | 15016 | 9118 | 15400 | 2605<br>8 | 43263 | 5660 |
| MIMAT00006<br>91 | hsa-miR-130b-3p                | Endogenous<br>1 | 58   | 68  | 129   | 572  | 285   | 1227      | 1855  | 268  |
| MIMAT00004<br>26 | hsa-miR-132-3p                 | Endogenous<br>1 | 143  | 25  | 88    | 362  | 502   | 590       | 466   | 87   |
| MIMAT00059<br>53 | hsa-miR-1322                   | Endogenous<br>1 | 48   | 43  | 31    | 50   | 59    | 60        | 26    | 24   |
| MIMAT00057<br>95 | hsa-miR-1323                   | Endogenous<br>1 | 50   | 56  | 30    | 75   | 85    | 77        | 40    | 29   |
| MIMAT00004<br>27 | hsa-miR-133a-3p                | Endogenous<br>1 | 24   | 26  | 20    | 22   | 35    | 26        | 44    | 23   |
| MIMAT00264<br>78 | hsa-miR-133a-5p                | Endogenous<br>1 | 29   | 33  | 26    | 30   | 30    | 38        | 23    | 20   |
| MIMAT00007<br>70 | hsa-miR-133b                   | Endogenous<br>1 | 20   | 28  | 29    | 95   | 34    | 81        | 241   | 88   |
| MIMAT00264<br>81 | hsa-miR-134-3p                 | Endogenous<br>1 | 26   | 23  | 20    | 20   | 29    | 22        | 20    | 31   |
| MIMAT00004<br>47 | hsa-miR-134-5p+hsa-miR-6728-5p | Endogenous<br>1 | 20   | 20  | 20    | 20   | 20    | 20        | 20    | 20   |
| MIMAT00004<br>28 | hsa-miR-135a-5p                | Endogenous<br>1 | 20   | 21  | 43    | 21   | 35    | 368       | 25807 | 856  |
| MIMAT00007<br>58 | hsa-miR-135b-5p                | Endogenous<br>1 | 20   | 20  | 780   | 570  | 31    | 1290      | 14837 | 1631 |
| MIMAT00004<br>48 | hsa-miR-136-5p                 | Endogenous<br>1 | 376  | 21  | 20    | 20   | 20    | 36        | 498   | 2645 |
| MIMAT00004<br>29 | hsa-miR-137                    | Endogenous<br>1 | 35   | 64  | 37    | 115  | 78    | 132       | 865   | 70   |

|              |                 |              |     |     |     |     |     |     |      |      |
|--------------|-----------------|--------------|-----|-----|-----|-----|-----|-----|------|------|
| MIMAT0000430 | hsa-miR-138-5p  | Endogenous 1 | 20  | 20  | 20  | 20  | 20  | 20  | 20   | 20   |
| MIMAT0004552 | hsa-miR-139-3p  | Endogenous 1 | 20  | 20  | 20  | 34  | 29  | 28  | 98   | 20   |
| MIMAT0000250 | hsa-miR-139-5p  | Endogenous 1 | 20  | 20  | 20  | 20  | 20  | 20  | 25   | 20   |
| MIMAT0004597 | hsa-miR-140-3p  | Endogenous 1 | 38  | 37  | 46  | 51  | 36  | 51  | 53   | 49   |
| MIMAT0000431 | hsa-miR-140-5p  | Endogenous 1 | 198 | 107 | 140 | 504 | 238 | 448 | 2845 | 1198 |
| MIMAT0000432 | hsa-miR-141-3p  | Endogenous 1 | 22  | 102 | 23  | 28  | 207 | 20  | 34   | 31   |
| MIMAT0000434 | hsa-miR-142-3p  | Endogenous 1 | 20  | 20  | 20  | 20  | 23  | 20  | 23   | 20   |
| MIMAT0000433 | hsa-miR-142-5p  | Endogenous 1 | 20  | 27  | 22  | 20  | 24  | 24  | 20   | 23   |
| MIMAT0000435 | hsa-miR-143-3p  | Endogenous 1 | 20  | 20  | 20  | 20  | 20  | 20  | 20   | 20   |
| MIMAT0000436 | hsa-miR-144-3p  | Endogenous 1 | 20  | 24  | 27  | 23  | 24  | 27  | 58   | 20   |
| MIMAT0000437 | hsa-miR-145-5p  | Endogenous 1 | 20  | 34  | 20  | 20  | 22  | 20  | 20   | 23   |
| MIMAT0007347 | hsa-miR-1469    | Endogenous 1 | 20  | 24  | 20  | 20  | 22  | 20  | 40   | 30   |
| MIMAT0000449 | hsa-miR-146a-5p | Endogenous 1 | 23  | 42  | 20  | 26  | 34  | 31  | 32   | 46   |
| MIMAT0004766 | hsa-miR-146b-3p | Endogenous 1 | 20  | 22  | 20  | 20  | 20  | 21  | 37   | 20   |
| MIMAT0002809 | hsa-miR-146b-5p | Endogenous 1 | 23  | 34  | 37  | 20  | 40  | 33  | 26   | 29   |



|                  |                 |                 |     |     |     |      |      |      |      |     |
|------------------|-----------------|-----------------|-----|-----|-----|------|------|------|------|-----|
| MIMAT00002<br>51 | hsa-miR-147a    | Endogenous<br>1 | 20  | 22  | 20  | 21   | 34   | 23   | 20   | 20  |
| MIMAT00049<br>28 | hsa-miR-147b    | Endogenous<br>1 | 29  | 20  | 25  | 25   | 38   | 24   | 25   | 20  |
| MIMAT00002<br>43 | hsa-miR-148a-3p | Endogenous<br>1 | 20  | 22  | 36  | 20   | 1195 | 21   | 1302 | 555 |
| MIMAT00007<br>59 | hsa-miR-148b-3p | Endogenous<br>1 | 386 | 75  | 557 | 1404 | 772  | 1731 | 4572 | 595 |
| MIMAT00004<br>50 | hsa-miR-149-5p  | Endogenous<br>1 | 44  | 28  | 98  | 1067 | 314  | 949  | 3374 | 941 |
| MIMAT00004<br>51 | hsa-miR-150-5p  | Endogenous<br>1 | 20  | 21  | 22  | 20   | 21   | 20   | 20   | 20  |
| MIMAT00007<br>57 | hsa-miR-151a-3p | Endogenous<br>1 | 305 | 242 | 256 | 636  | 382  | 733  | 999  | 287 |
| MIMAT00046<br>97 | hsa-miR-151a-5p | Endogenous<br>1 | 135 | 20  | 66  | 159  | 109  | 248  | 215  | 81  |
| MIMAT00102<br>14 | hsa-miR-151b    | Endogenous<br>1 | 20  | 20  | 20  | 20   | 21   | 20   | 20   | 20  |
| MIMAT00004<br>38 | hsa-miR-152-3p  | Endogenous<br>1 | 20  | 20  | 21  | 22   | 22   | 20   | 60   | 27  |
| MIMAT00264<br>79 | hsa-miR-152-5p  | Endogenous<br>1 | 20  | 40  | 26  | 20   | 21   | 20   | 27   | 20  |
| MIMAT00004<br>39 | hsa-miR-153-3p  | Endogenous<br>1 | 20  | 30  | 20  | 20   | 28   | 21   | 150  | 45  |
| MIMAT00073<br>99 | hsa-miR-1537-3p | Endogenous<br>1 | 36  | 32  | 658 | 56   | 45   | 71   | 94   | 72  |
| MIMAT00004<br>52 | hsa-miR-154-5p  | Endogenous<br>1 | 324 | 21  | 20  | 20   | 22   | 33   | 92   | 367 |
| MIMAT00006<br>46 | hsa-miR-155-5p  | Endogenous<br>1 | 43  | 24  | 25  | 32   | 63   | 41   | 22   | 31  |

|              |                                 |              |      |     |      |       |      |       |       |       |
|--------------|---------------------------------|--------------|------|-----|------|-------|------|-------|-------|-------|
| MIMAT0000068 | hsa-miR-15a-5p                  | Endogenous 1 | 1271 | 209 | 2346 | 4875  | 2072 | 4942  | 6738  | 5009  |
| MIMAT0000417 | hsa-miR-15b-5p                  | Endogenous 1 | 4135 | 86  | 1969 | 16534 | 8173 | 18603 | 15020 | 2562  |
| MIMAT0000069 | hsa-miR-16-5p                   | Endogenous 1 | 3480 | 34  | 1390 | 10745 | 9470 | 11776 | 12320 | 838   |
| MIMAT0004558 | hsa-miR-181a-2-3p               | Endogenous 1 | 24   | 22  | 25   | 52    | 56   | 51    | 232   | 54    |
| MIMAT0000270 | hsa-miR-181a-3p                 | Endogenous 1 | 22   | 53  | 29   | 158   | 35   | 130   | 576   | 228   |
| MIMAT0000256 | hsa-miR-181a-5p                 | Endogenous 1 | 241  | 801 | 232  | 3935  | 236  | 2446  | 23571 | 10483 |
| MIMAT0031893 | hsa-miR-181b-2-3p               | Endogenous 1 | 24   | 29  | 39   | 44    | 45   | 35    | 32    | 20    |
| MIMAT0000257 | hsa-miR-181b-5p+hsa-miR-181d-5p | Endogenous 1 | 38   | 54  | 32   | 147   | 64   | 114   | 551   | 104   |
| MIMAT0000258 | hsa-miR-181c-5p                 | Endogenous 1 | 37   | 20  | 21   | 61    | 22   | 73    | 478   | 301   |
| MIMAT0026608 | hsa-miR-181d-3p                 | Endogenous 1 | 20   | 34  | 20   | 20    | 36   | 20    | 27    | 20    |
| MIMAT0000260 | hsa-miR-182-3p                  | Endogenous 1 | 26   | 38  | 21   | 26    | 50   | 20    | 21    | 20    |
| MIMAT0000259 | hsa-miR-182-5p                  | Endogenous 1 | 21   | 29  | 20   | 465   | 465  | 21    | 39    | 20    |
| MIMAT0006767 | hsa-miR-1827                    | Endogenous 1 | 20   | 29  | 20   | 24    | 34   | 33    | 20    | 20    |
| MIMAT0000261 | hsa-miR-183-5p                  | Endogenous 1 | 75   | 52  | 53   | 1225  | 915  | 51    | 50    | 20    |
| MIMAT0000454 | hsa-miR-184                     | Endogenous 1 | 21   | 26  | 20   | 28    | 27   | 20    | 20    | 20    |

|                  |                 |                 |      |     |      |           |      |      |      |      |
|------------------|-----------------|-----------------|------|-----|------|-----------|------|------|------|------|
| MIMAT00004<br>55 | hsa-miR-185-5p  | Endogenous<br>1 | 106  | 31  | 113  | 219       | 92   | 171  | 234  | 185  |
| MIMAT00004<br>56 | hsa-miR-186-5p  | Endogenous<br>1 | 283  | 62  | 94   | 217       | 631  | 248  | 541  | 264  |
| MIMAT00002<br>62 | hsa-miR-187-3p  | Endogenous<br>1 | 20   | 26  | 20   | 20        | 32   | 27   | 34   | 20   |
| MIMAT00046<br>13 | hsa-miR-188-3p  | Endogenous<br>1 | 20   | 20  | 20   | 20        | 25   | 20   | 20   | 20   |
| MIMAT00004<br>57 | hsa-miR-188-5p  | Endogenous<br>1 | 20   | 29  | 25   | 21        | 37   | 31   | 25   | 20   |
| MIMAT00000<br>72 | hsa-miR-18a-5p  | Endogenous<br>1 | 216  | 28  | 708  | 808       | 1200 | 1363 | 6636 | 294  |
| MIMAT00014<br>12 | hsa-miR-18b-5p  | Endogenous<br>1 | 20   | 23  | 28   | 32        | 33   | 24   | 1355 | 35   |
| MIMAT00269<br>16 | hsa-miR-1908-3p | Endogenous<br>1 | 20   | 21  | 28   | 21        | 28   | 20   | 20   | 20   |
| MIMAT00078<br>81 | hsa-miR-1908-5p | Endogenous<br>1 | 23   | 46  | 44   | 94        | 62   | 57   | 61   | 35   |
| MIMAT00078<br>83 | hsa-miR-1909-3p | Endogenous<br>1 | 20   | 20  | 21   | 20        | 20   | 20   | 20   | 20   |
| MIMAT00264<br>82 | hsa-miR-190a-3p | Endogenous<br>1 | 20   | 20  | 20   | 20        | 20   | 20   | 20   | 20   |
| MIMAT00004<br>58 | hsa-miR-190a-5p | Endogenous<br>1 | 20   | 20  | 82   | 20        | 28   | 32   | 139  | 79   |
| MIMAT00049<br>29 | hsa-miR-190b    | Endogenous<br>1 | 20   | 20  | 20   | 20        | 20   | 20   | 20   | 20   |
| MIMAT00004<br>40 | hsa-miR-191-5p  | Endogenous<br>1 | 3226 | 230 | 1711 | 1245<br>4 | 3738 | 5787 | 4831 | 2126 |
| MIMAT00269<br>17 | hsa-miR-1910-3p | Endogenous<br>1 | 20   | 38  | 20   | 20        | 20   | 22   | 25   | 20   |

|                  |                                 |                 |     |    |     |     |     |     |     |     |
|------------------|---------------------------------|-----------------|-----|----|-----|-----|-----|-----|-----|-----|
| MIMAT00078<br>84 | hsa-miR-1910-5p                 | Endogenous<br>1 | 20  | 21 | 21  | 20  | 30  | 20  | 20  | 29  |
| MIMAT00078<br>92 | hsa-miR-1915-3p                 | Endogenous<br>1 | 20  | 43 | 23  | 29  | 24  | 34  | 58  | 23  |
| MIMAT00002<br>22 | hsa-miR-192-5p                  | Endogenous<br>1 | 121 | 28 | 33  | 33  | 49  | 46  | 45  | 20  |
| MIMAT00004<br>59 | hsa-miR-193a-3p                 | Endogenous<br>1 | 20  | 20 | 204 | 20  | 20  | 20  | 20  | 20  |
| MIMAT00046<br>14 | hsa-miR-193a-5p+hsa-miR-193b-5p | Endogenous<br>1 | 29  | 41 | 59  | 44  | 41  | 44  | 25  | 46  |
| MIMAT00028<br>19 | hsa-miR-193b-3p                 | Endogenous<br>1 | 20  | 25 | 443 | 20  | 75  | 21  | 67  | 64  |
| MIMAT00004<br>60 | hsa-miR-194-5p                  | Endogenous<br>1 | 550 | 24 | 45  | 35  | 35  | 87  | 191 | 79  |
| MIMAT00004<br>61 | hsa-miR-195-5p                  | Endogenous<br>1 | 24  | 30 | 26  | 123 | 25  | 63  | 20  | 43  |
| MIMAT00045<br>62 | hsa-miR-196a-3p                 | Endogenous<br>1 | 24  | 20 | 20  | 20  | 27  | 20  | 20  | 20  |
| MIMAT00002<br>26 | hsa-miR-196a-5p                 | Endogenous<br>1 | 30  | 51 | 41  | 44  | 41  | 85  | 21  | 22  |
| MIMAT00010<br>80 | hsa-miR-196b-5p                 | Endogenous<br>1 | 20  | 20 | 20  | 20  | 20  | 20  | 20  | 20  |
| MIMAT00002<br>27 | hsa-miR-197-3p                  | Endogenous<br>1 | 61  | 45 | 67  | 246 | 231 | 273 | 407 | 55  |
| MIMAT00226<br>91 | hsa-miR-197-5p                  | Endogenous<br>1 | 36  | 43 | 39  | 45  | 46  | 36  | 37  | 21  |
| MIMAT00094<br>47 | hsa-miR-1972                    | Endogenous<br>1 | 20  | 30 | 37  | 123 | 40  | 86  | 36  | 128 |
| MIMAT00094<br>48 | hsa-miR-1973                    | Endogenous<br>1 | 22  | 29 | 29  | 53  | 43  | 59  | 20  | 26  |

|                  |                                 |                 |     |     |       |      |      |           |       |      |
|------------------|---------------------------------|-----------------|-----|-----|-------|------|------|-----------|-------|------|
| MIMAT00094<br>51 | hsa-miR-1976                    | Endogenous<br>1 | 20  | 26  | 20    | 20   | 38   | 23        | 25    | 20   |
| MIMAT00002<br>28 | hsa-miR-198                     | Endogenous<br>1 | 20  | 21  | 20    | 20   | 20   | 23        | 20    | 20   |
| MIMAT00002<br>32 | hsa-miR-199a-3p+hsa-miR-199b-3p | Endogenous<br>1 | 33  | 42  | 11080 | 74   | 66   | 2248<br>5 | 113   | 25   |
| MIMAT00002<br>31 | hsa-miR-199a-5p                 | Endogenous<br>1 | 25  | 26  | 29213 | 20   | 44   | 6635      | 81    | 20   |
| MIMAT00002<br>63 | hsa-miR-199b-5p                 | Endogenous<br>1 | 20  | 20  | 73    | 20   | 25   | 30        | 34    | 20   |
| MIMAT00000<br>73 | hsa-miR-19a-3p                  | Endogenous<br>1 | 196 | 21  | 1714  | 813  | 1257 | 1130      | 12852 | 1732 |
| MIMAT00000<br>74 | hsa-miR-19b-3p                  | Endogenous<br>1 | 351 | 33  | 2011  | 1160 | 1932 | 1788      | 14796 | 3074 |
| MIMAT00006<br>82 | hsa-miR-200a-3p                 | Endogenous<br>1 | 20  | 31  | 20    | 25   | 25   | 24        | 43    | 22   |
| MIMAT00003<br>18 | hsa-miR-200b-3p                 | Endogenous<br>1 | 20  | 23  | 20    | 26   | 33   | 23        | 20    | 20   |
| MIMAT00006<br>17 | hsa-miR-200c-3p                 | Endogenous<br>1 | 28  | 252 | 25    | 34   | 2649 | 35        | 41    | 20   |
| MIMAT00028<br>11 | hsa-miR-202-3p                  | Endogenous<br>1 | 20  | 20  | 20    | 20   | 20   | 20        | 20    | 20   |
| MIMAT00002<br>64 | hsa-miR-203a-3p                 | Endogenous<br>1 | 20  | 27  | 20    | 20   | 31   | 27        | 24    | 20   |
| MIMAT00318<br>90 | hsa-miR-203a-5p                 | Endogenous<br>1 | 28  | 47  | 28    | 29   | 49   | 36        | 30    | 24   |
| MIMAT00002<br>65 | hsa-miR-204-5p                  | Endogenous<br>1 | 20  | 22  | 20    | 53   | 20   | 20        | 5699  | 110  |
| MIMAT00002<br>66 | hsa-miR-205-5p                  | Endogenous<br>1 | 20  | 22  | 27    | 27   | 135  | 23        | 103   | 20   |

|                  |                               |                 |      |     |      |      |      |      |       |       |
|------------------|-------------------------------|-----------------|------|-----|------|------|------|------|-------|-------|
| MIMAT00099<br>78 | hsa-miR-2053                  | Endogenous<br>1 | 20   | 20  | 20   | 20   | 20   | 20   | 20    | 20    |
| MIMAT00004<br>62 | hsa-miR-206                   | Endogenous<br>1 | 25   | 35  | 20   | 79   | 79   | 29   | 25    | 20    |
| MIMAT00002<br>41 | hsa-miR-208a-3p               | Endogenous<br>1 | 37   | 53  | 30   | 30   | 48   | 39   | 20    | 24    |
| MIMAT00049<br>60 | hsa-miR-208b-3p               | Endogenous<br>1 | 20   | 26  | 20   | 25   | 33   | 31   | 43    | 20    |
| MIMAT00267<br>22 | hsa-miR-208b-5p               | Endogenous<br>1 | 20   | 36  | 22   | 20   | 26   | 20   | 20    | 20    |
| MIMAT00000<br>75 | hsa-miR-20a-5p+hsa-miR-20b-5p | Endogenous<br>1 | 757  | 761 | 1266 | 3072 | 4454 | 5154 | 14180 | 1302  |
| MIMAT00000<br>76 | hsa-miR-21-5p                 | Endogenous<br>1 | 8378 | 296 | 2196 | 603  | 312  | 281  | 1524  | 16610 |
| MIMAT00002<br>67 | hsa-miR-210-3p                | Endogenous<br>1 | 31   | 30  | 54   | 116  | 51   | 53   | 76    | 36    |
| MIMAT00264<br>75 | hsa-miR-210-5p                | Endogenous<br>1 | 23   | 23  | 20   | 21   | 23   | 20   | 20    | 20    |
| MIMAT00226<br>94 | hsa-miR-211-3p                | Endogenous<br>1 | 21   | 26  | 21   | 20   | 24   | 23   | 20    | 20    |
| MIMAT00002<br>68 | hsa-miR-211-5p                | Endogenous<br>1 | 20   | 20  | 20   | 20   | 20   | 20   | 20    | 20    |
| MIMAT00101<br>33 | hsa-miR-2110                  | Endogenous<br>1 | 24   | 20  | 20   | 30   | 31   | 23   | 20    | 23    |
| MIMAT00092<br>06 | hsa-miR-2113                  | Endogenous<br>1 | 20   | 21  | 22   | 20   | 25   | 28   | 27    | 20    |
| MIMAT00111<br>60 | hsa-miR-2116-5p               | Endogenous<br>1 | 40   | 47  | 20   | 45   | 62   | 42   | 23    | 20    |
| MIMAT00111<br>62 | hsa-miR-2117                  | Endogenous<br>1 | 36   | 39  | 45   | 41   | 124  | 62   | 40    | 65    |

|                  |                   |                 |      |     |      |      |      |      |      |      |
|------------------|-------------------|-----------------|------|-----|------|------|------|------|------|------|
| MIMAT00002<br>69 | hsa-miR-212-3p    | Endogenous<br>1 | 20   | 20  | 20   | 30   | 35   | 25   | 20   | 24   |
| MIMAT00002<br>71 | hsa-miR-214-3p    | Endogenous<br>1 | 20   | 20  | 587  | 20   | 20   | 1080 | 20   | 20   |
| MIMAT00002<br>72 | hsa-miR-215-5p    | Endogenous<br>1 | 22   | 20  | 20   | 20   | 27   | 27   | 20   | 20   |
| MIMAT00002<br>73 | hsa-miR-216a-5p   | Endogenous<br>1 | 20   | 20  | 20   | 20   | 25   | 20   | 132  | 20   |
| MIMAT00049<br>59 | hsa-miR-216b-5p   | Endogenous<br>1 | 42   | 35  | 53   | 563  | 976  | 257  | 1015 | 45   |
| MIMAT00002<br>74 | hsa-miR-217       | Endogenous<br>1 | 20   | 20  | 20   | 58   | 122  | 20   | 135  | 20   |
| MIMAT00002<br>75 | hsa-miR-218-5p    | Endogenous<br>1 | 21   | 275 | 580  | 527  | 40   | 612  | 1926 | 151  |
| MIMAT00045<br>67 | hsa-miR-219a-1-3p | Endogenous<br>1 | 20   | 20  | 20   | 20   | 25   | 20   | 64   | 43   |
| MIMAT00046<br>75 | hsa-miR-219a-2-3p | Endogenous<br>1 | 20   | 20  | 20   | 20   | 22   | 20   | 1515 | 20   |
| MIMAT00002<br>76 | hsa-miR-219a-5p   | Endogenous<br>1 | 20   | 20  | 20   | 30   | 31   | 22   | 1662 | 38   |
| MIMAT00197<br>48 | hsa-miR-219b-3p   | Endogenous<br>1 | 36   | 50  | 20   | 70   | 100  | 54   | 20   | 20   |
| MIMAT00000<br>77 | hsa-miR-22-3p     | Endogenous<br>1 | 649  | 54  | 1055 | 1195 | 798  | 357  | 583  | 4324 |
| MIMAT00002<br>78 | hsa-miR-221-3p    | Endogenous<br>1 | 96   | 30  | 355  | 2738 | 4580 | 1276 | 4795 | 1125 |
| MIMAT00045<br>68 | hsa-miR-221-5p    | Endogenous<br>1 | 29   | 24  | 20   | 27   | 28   | 31   | 67   | 40   |
| MIMAT00002<br>79 | hsa-miR-222-3p    | Endogenous<br>1 | 1676 | 373 | 116  | 549  | 511  | 445  | 1249 | 1397 |

|              |                 |              |      |      |      |      |      |      |      |      |
|--------------|-----------------|--------------|------|------|------|------|------|------|------|------|
| MIMAT0000280 | hsa-miR-223-3p  | Endogenous 1 | 20   | 23   | 20   | 20   | 30   | 23   | 20   | 20   |
| MIMAT0000281 | hsa-miR-224-5p  | Endogenous 1 | 21   | 31   | 24   | 20   | 32   | 23   | 21   | 20   |
| MIMAT0011778 | hsa-miR-2278    | Endogenous 1 | 20   | 24   | 20   | 20   | 27   | 20   | 20   | 20   |
| MIMAT0000078 | hsa-miR-23a-3p  | Endogenous 1 | 5128 | 2292 | 1237 | 4175 | 2353 | 2346 | 1422 | 4881 |
| MIMAT0000418 | hsa-miR-23b-3p  | Endogenous 1 | 506  | 139  | 771  | 979  | 2555 | 395  | 978  | 2923 |
| MIMAT0018000 | hsa-miR-23c     | Endogenous 1 | 24   | 33   | 21   | 21   | 28   | 29   | 20   | 33   |
| MIMAT0000080 | hsa-miR-24-3p   | Endogenous 1 | 1141 | 27   | 362  | 642  | 1216 | 227  | 541  | 697  |
| MIMAT0000081 | hsa-miR-25-3p   | Endogenous 1 | 1150 | 27   | 1421 | 7137 | 3071 | 9759 | 8558 | 1327 |
| MIMAT0004498 | hsa-miR-25-5p   | Endogenous 1 | 22   | 24   | 22   | 30   | 33   | 31   | 32   | 20   |
| MIMAT0013517 | hsa-miR-2682-5p | Endogenous 1 | 20   | 23   | 20   | 20   | 26   | 28   | 20   | 20   |
| MIMAT0000082 | hsa-miR-26a-5p  | Endogenous 1 | 184  | 117  | 151  | 2031 | 1096 | 1499 | 938  | 452  |
| MIMAT0000083 | hsa-miR-26b-5p  | Endogenous 1 | 427  | 104  | 82   | 181  | 287  | 397  | 391  | 173  |
| MIMAT0000084 | hsa-miR-27a-3p  | Endogenous 1 | 38   | 21   | 47   | 139  | 76   | 95   | 316  | 121  |
| MIMAT0000419 | hsa-miR-27b-3p  | Endogenous 1 | 208  | 25   | 3328 | 1129 | 3281 | 485  | 1080 | 2370 |
| MIMAT0004502 | hsa-miR-28-3p   | Endogenous 1 | 58   | 44   | 74   | 126  | 112  | 89   | 184  | 191  |



|              |                 |              |       |     |        |      |      |     |       |       |
|--------------|-----------------|--------------|-------|-----|--------|------|------|-----|-------|-------|
| MIMAT0000085 | hsa-miR-28-5p   | Endogenous 1 | 338   | 384 | 120    | 920  | 697  | 784 | 546   | 493   |
| MIMAT0004679 | hsa-miR-296-3p  | Endogenous 1 | 20    | 26  | 20     | 20   | 20   | 20  | 22    | 20    |
| MIMAT0000690 | hsa-miR-296-5p  | Endogenous 1 | 195   | 20  | 20     | 57   | 32   | 28  | 1130  | 39    |
| MIMAT0004450 | hsa-miR-297     | Endogenous 1 | 20    | 20  | 20     | 23   | 20   | 22  | 98    | 20    |
| MIMAT0004901 | hsa-miR-298     | Endogenous 1 | 20    | 34  | 20     | 20   | 23   | 26  | 23    | 20    |
| MIMAT0000687 | hsa-miR-299-3p  | Endogenous 1 | 101   | 36  | 62     | 35   | 70   | 54  | 190   | 266   |
| MIMAT0002890 | hsa-miR-299-5p  | Endogenous 1 | 356   | 42  | 31     | 23   | 60   | 75  | 149   | 364   |
| MIMAT0000086 | hsa-miR-29a-3p  | Endogenous 1 | 3536  | 187 | 25258  | 1339 | 1331 | 417 | 479   | 9641  |
| MIMAT0000100 | hsa-miR-29b-3p  | Endogenous 1 | 10642 | 554 | 233395 | 1391 | 2679 | 507 | 1046  | 11844 |
| MIMAT0000681 | hsa-miR-29c-3p  | Endogenous 1 | 146   | 23  | 453    | 165  | 234  | 211 | 1475  | 473   |
| MIMAT0004903 | hsa-miR-300     | Endogenous 1 | 20    | 20  | 20     | 26   | 20   | 22  | 20    | 20    |
| MIMAT0000688 | hsa-miR-301a-3p | Endogenous 1 | 80    | 29  | 613    | 763  | 383  | 777 | 15008 | 691   |
| MIMAT0022696 | hsa-miR-301a-5p | Endogenous 1 | 35    | 31  | 52     | 53   | 51   | 63  | 209   | 26    |
| MIMAT0004958 | hsa-miR-301b-3p | Endogenous 1 | 20    | 26  | 42     | 64   | 36   | 118 | 1578  | 28    |
| MIMAT0032026 | hsa-miR-301b-5p | Endogenous 1 | 20    | 21  | 26     | 24   | 26   | 26  | 24    | 20    |

|                  |                 |                 |      |     |    |     |     |     |      |      |
|------------------|-----------------|-----------------|------|-----|----|-----|-----|-----|------|------|
| MIMAT00006<br>84 | hsa-miR-302a-3p | Endogenous<br>1 | 20   | 22  | 20 | 20  | 29  | 20  | 23   | 20   |
| MIMAT00006<br>83 | hsa-miR-302a-5p | Endogenous<br>1 | 25   | 33  | 20 | 26  | 33  | 29  | 56   | 20   |
| MIMAT00007<br>15 | hsa-miR-302b-3p | Endogenous<br>1 | 51   | 30  | 23 | 31  | 34  | 40  | 24   | 20   |
| MIMAT00007<br>17 | hsa-miR-302c-3p | Endogenous<br>1 | 20   | 20  | 20 | 20  | 20  | 20  | 20   | 20   |
| MIMAT00007<br>18 | hsa-miR-302d-3p | Endogenous<br>1 | 20   | 20  | 35 | 33  | 20  | 22  | 20   | 20   |
| MIMAT00059<br>31 | hsa-miR-302e    | Endogenous<br>1 | 20   | 20  | 20 | 20  | 20  | 20  | 20   | 20   |
| MIMAT00059<br>32 | hsa-miR-302f    | Endogenous<br>1 | 20   | 20  | 20 | 20  | 33  | 26  | 20   | 20   |
| MIMAT00153<br>78 | hsa-miR-3065-3p | Endogenous<br>1 | 32   | 22  | 20 | 31  | 32  | 26  | 89   | 21   |
| MIMAT00150<br>66 | hsa-miR-3065-5p | Endogenous<br>1 | 20   | 20  | 20 | 20  | 20  | 20  | 74   | 20   |
| MIMAT00150<br>27 | hsa-miR-3074-3p | Endogenous<br>1 | 20   | 33  | 25 | 20  | 24  | 25  | 20   | 20   |
| MIMAT00000<br>88 | hsa-miR-30a-3p  | Endogenous<br>1 | 628  | 28  | 48 | 30  | 50  | 241 | 238  | 84   |
| MIMAT00000<br>87 | hsa-miR-30a-5p  | Endogenous<br>1 | 4642 | 151 | 35 | 39  | 45  | 286 | 1669 | 1744 |
| MIMAT00004<br>20 | hsa-miR-30b-5p  | Endogenous<br>1 | 140  | 20  | 50 | 148 | 367 | 203 | 645  | 170  |
| MIMAT00002<br>44 | hsa-miR-30c-5p  | Endogenous<br>1 | 511  | 21  | 73 | 152 | 188 | 358 | 1643 | 391  |
| MIMAT00002<br>45 | hsa-miR-30d-5p  | Endogenous<br>1 | 831  | 59  | 72 | 155 | 124 | 341 | 1409 | 622  |

|                  |                  |                 |     |     |     |     |     |     |      |     |
|------------------|------------------|-----------------|-----|-----|-----|-----|-----|-----|------|-----|
| MIMAT00006<br>93 | hsa-miR-30e-3p   | Endogenous<br>1 | 256 | 39  | 43  | 108 | 99  | 189 | 281  | 65  |
| MIMAT00006<br>92 | hsa-miR-30e-5p   | Endogenous<br>1 | 285 | 105 | 117 | 76  | 101 | 99  | 956  | 741 |
| MIMAT00000<br>89 | hsa-miR-31-5p    | Endogenous<br>1 | 322 | 20  | 71  | 105 | 23  | 20  | 20   | 20  |
| MIMAT00149<br>90 | hsa-miR-3127-5p  | Endogenous<br>1 | 27  | 35  | 22  | 29  | 46  | 33  | 30   | 20  |
| MIMAT00149<br>94 | hsa-miR-3130-3p  | Endogenous<br>1 | 23  | 40  | 28  | 20  | 24  | 26  | 24   | 20  |
| MIMAT00149<br>96 | hsa-miR-3131     | Endogenous<br>1 | 20  | 38  | 30  | 20  | 23  | 32  | 21   | 20  |
| MIMAT00150<br>03 | hsa-miR-3136-5p  | Endogenous<br>1 | 25  | 35  | 23  | 24  | 39  | 25  | 22   | 41  |
| MIMAT00150<br>08 | hsa-miR-3140-3p  | Endogenous<br>1 | 20  | 28  | 20  | 26  | 61  | 30  | 20   | 20  |
| MIMAT00192<br>04 | hsa-miR-3140-5p  | Endogenous<br>1 | 20  | 33  | 20  | 20  | 23  | 25  | 29   | 20  |
| MIMAT00150<br>15 | hsa-miR-3144-3p  | Endogenous<br>1 | 35  | 20  | 72  | 57  | 50  | 83  | 28   | 20  |
| MIMAT00150<br>14 | hsa-miR-3144-5p  | Endogenous<br>1 | 20  | 24  | 20  | 20  | 24  | 20  | 20   | 20  |
| MIMAT00150<br>19 | hsa-miR-3147     | Endogenous<br>1 | 25  | 31  | 38  | 29  | 43  | 38  | 30   | 20  |
| MIMAT00181<br>94 | hsa-miR-3150b-3p | Endogenous<br>1 | 20  | 22  | 20  | 20  | 20  | 20  | 20   | 26  |
| MIMAT00150<br>24 | hsa-miR-3151-5p  | Endogenous<br>1 | 20  | 32  | 20  | 20  | 29  | 38  | 1499 | 61  |
| MIMAT00150<br>32 | hsa-miR-3158-3p  | Endogenous<br>1 | 22  | 20  | 20  | 20  | 22  | 31  | 20   | 20  |

|                  |                 |                 |     |    |      |     |     |     |      |     |
|------------------|-----------------|-----------------|-----|----|------|-----|-----|-----|------|-----|
| MIMAT00150<br>35 | hsa-miR-3161    | Endogenous<br>1 | 42  | 64 | 41   | 32  | 58  | 21  | 25   | 117 |
| MIMAT00150<br>38 | hsa-miR-3164    | Endogenous<br>1 | 20  | 31 | 27   | 20  | 20  | 20  | 20   | 26  |
| MIMAT00150<br>43 | hsa-miR-3168    | Endogenous<br>1 | 20  | 33 | 20   | 25  | 39  | 28  | 45   | 20  |
| MIMAT00150<br>56 | hsa-miR-3179    | Endogenous<br>1 | 20  | 27 | 20   | 20  | 20  | 20  | 20   | 20  |
| MIMAT00181<br>78 | hsa-miR-3180    | Endogenous<br>1 | 20  | 21 | 20   | 20  | 24  | 26  | 27   | 20  |
| MIMAT00150<br>58 | hsa-miR-3180-3p | Endogenous<br>1 | 20  | 20 | 20   | 20  | 21  | 20  | 20   | 20  |
| MIMAT00150<br>57 | hsa-miR-3180-5p | Endogenous<br>1 | 23  | 33 | 30   | 20  | 29  | 26  | 20   | 23  |
| MIMAT00150<br>62 | hsa-miR-3182    | Endogenous<br>1 | 23  | 22 | 22   | 23  | 37  | 34  | 20   | 34  |
| MIMAT00150<br>65 | hsa-miR-3185    | Endogenous<br>1 | 20  | 20 | 20   | 20  | 20  | 20  | 22   | 44  |
| MIMAT00228<br>39 | hsa-miR-3190-3p | Endogenous<br>1 | 20  | 20 | 20   | 20  | 20  | 20  | 20   | 20  |
| MIMAT00150<br>76 | hsa-miR-3192-5p | Endogenous<br>1 | 26  | 35 | 30   | 20  | 30  | 21  | 20   | 20  |
| MIMAT00150<br>79 | hsa-miR-3195    | Endogenous<br>1 | 23  | 38 | 37   | 31  | 54  | 22  | 33   | 36  |
| MIMAT00150<br>80 | hsa-miR-3196    | Endogenous<br>1 | 20  | 26 | 20   | 20  | 20  | 20  | 20   | 20  |
| MIMAT00000<br>90 | hsa-miR-32-5p   | Endogenous<br>1 | 215 | 36 | 2128 | 445 | 310 | 428 | 8951 | 897 |
| MIMAT00150<br>89 | hsa-miR-3202    | Endogenous<br>1 | 20  | 33 | 21   | 22  | 23  | 22  | 20   | 28  |

|                  |                 |                 |      |     |     |     |     |     |      |     |
|------------------|-----------------|-----------------|------|-----|-----|-----|-----|-----|------|-----|
| MIMAT00005<br>10 | hsa-miR-320a    | Endogenous<br>1 | 20   | 20  | 20  | 22  | 33  | 29  | 23   | 26  |
| MIMAT00057<br>92 | hsa-miR-320b    | Endogenous<br>1 | 20   | 20  | 21  | 20  | 35  | 20  | 20   | 44  |
| MIMAT00057<br>93 | hsa-miR-320c    | Endogenous<br>1 | 20   | 20  | 51  | 20  | 20  | 20  | 20   | 20  |
| MIMAT00067<br>64 | hsa-miR-320d    | Endogenous<br>1 | 24   | 26  | 23  | 20  | 30  | 27  | 29   | 20  |
| MIMAT00150<br>72 | hsa-miR-320e    | Endogenous<br>1 | 36   | 191 | 27  | 63  | 52  | 86  | 90   | 113 |
| MIMAT00007<br>55 | hsa-miR-323a-3p | Endogenous<br>1 | 1484 | 29  | 20  | 27  | 46  | 102 | 440  | 319 |
| MIMAT00046<br>96 | hsa-miR-323a-5p | Endogenous<br>1 | 20   | 25  | 20  | 20  | 20  | 22  | 20   | 20  |
| MIMAT00150<br>50 | hsa-miR-323b-3p | Endogenous<br>1 | 23   | 36  | 36  | 22  | 48  | 31  | 27   | 28  |
| MIMAT00016<br>30 | hsa-miR-323b-5p | Endogenous<br>1 | 20   | 20  | 20  | 20  | 20  | 20  | 20   | 20  |
| MIMAT00007<br>62 | hsa-miR-324-3p  | Endogenous<br>1 | 20   | 20  | 20  | 20  | 20  | 20  | 23   | 20  |
| MIMAT00007<br>61 | hsa-miR-324-5p  | Endogenous<br>1 | 130  | 20  | 469 | 636 | 341 | 879 | 2155 | 243 |
| MIMAT00007<br>71 | hsa-miR-325     | Endogenous<br>1 | 21   | 33  | 24  | 23  | 33  | 25  | 20   | 20  |
| MIMAT00007<br>56 | hsa-miR-326     | Endogenous<br>1 | 20   | 20  | 20  | 20  | 20  | 20  | 20   | 20  |
| MIMAT00007<br>52 | hsa-miR-328-3p  | Endogenous<br>1 | 20   | 32  | 22  | 27  | 26  | 25  | 79   | 38  |
| MIMAT00264<br>86 | hsa-miR-328-5p  | Endogenous<br>1 | 28   | 37  | 20  | 40  | 31  | 38  | 28   | 20  |

|                  |                |                 |     |     |     |     |      |     |      |      |
|------------------|----------------|-----------------|-----|-----|-----|-----|------|-----|------|------|
| MIMAT00016<br>29 | hsa-miR-329-3p | Endogenous<br>1 | 59  | 20  | 20  | 20  | 20   | 20  | 50   | 55   |
| MIMAT00265<br>55 | hsa-miR-329-5p | Endogenous<br>1 | 27  | 23  | 21  | 33  | 44   | 40  | 25   | 20   |
| MIMAT00007<br>51 | hsa-miR-330-3p | Endogenous<br>1 | 47  | 20  | 20  | 27  | 23   | 27  | 33   | 24   |
| MIMAT00046<br>93 | hsa-miR-330-5p | Endogenous<br>1 | 21  | 35  | 21  | 21  | 26   | 24  | 38   | 20   |
| MIMAT00007<br>60 | hsa-miR-331-3p | Endogenous<br>1 | 158 | 37  | 240 | 373 | 1420 | 527 | 3360 | 96   |
| MIMAT00047<br>00 | hsa-miR-331-5p | Endogenous<br>1 | 20  | 20  | 20  | 20  | 23   | 20  | 20   | 20   |
| MIMAT00007<br>65 | hsa-miR-335-5p | Endogenous<br>1 | 21  | 20  | 97  | 20  | 51   | 841 | 1139 | 195  |
| MIMAT00007<br>54 | hsa-miR-337-3p | Endogenous<br>1 | 46  | 20  | 20  | 20  | 25   | 22  | 35   | 40   |
| MIMAT00046<br>95 | hsa-miR-337-5p | Endogenous<br>1 | 532 | 29  | 22  | 20  | 35   | 39  | 87   | 669  |
| MIMAT00047<br>01 | hsa-miR-338-5p | Endogenous<br>1 | 20  | 21  | 20  | 20  | 20   | 23  | 20   | 20   |
| MIMAT00047<br>02 | hsa-miR-339-3p | Endogenous<br>1 | 20  | 20  | 20  | 20  | 20   | 24  | 37   | 20   |
| MIMAT00007<br>64 | hsa-miR-339-5p | Endogenous<br>1 | 20  | 20  | 20  | 20  | 26   | 20  | 20   | 20   |
| MIMAT00000<br>91 | hsa-miR-33a-5p | Endogenous<br>1 | 30  | 40  | 684 | 98  | 27   | 67  | 928  | 274  |
| MIMAT00033<br>01 | hsa-miR-33b-5p | Endogenous<br>1 | 20  | 31  | 35  | 25  | 41   | 22  | 21   | 24   |
| MIMAT00046<br>92 | hsa-miR-340-5p | Endogenous<br>1 | 101 | 106 | 200 | 473 | 2126 | 588 | 9235 | 1255 |

|                  |                 |                 |      |     |      |      |      |      |      |      |
|------------------|-----------------|-----------------|------|-----|------|------|------|------|------|------|
| MIMAT00007<br>53 | hsa-miR-342-3p  | Endogenous<br>1 | 761  | 20  | 111  | 445  | 266  | 1244 | 3473 | 375  |
| MIMAT00046<br>94 | hsa-miR-342-5p  | Endogenous<br>1 | 20   | 25  | 20   | 20   | 38   | 20   | 20   | 34   |
| MIMAT00226<br>98 | hsa-miR-345-3p  | Endogenous<br>1 | 25   | 34  | 25   | 20   | 23   | 29   | 20   | 20   |
| MIMAT00007<br>72 | hsa-miR-345-5p  | Endogenous<br>1 | 20   | 20  | 149  | 84   | 59   | 100  | 174  | 56   |
| MIMAT00007<br>73 | hsa-miR-346     | Endogenous<br>1 | 20   | 40  | 27   | 27   | 36   | 35   | 30   | 20   |
| MIMAT00002<br>55 | hsa-miR-34a-5p  | Endogenous<br>1 | 1744 | 29  | 6165 | 1909 | 84   | 1459 | 188  | 2575 |
| MIMAT00046<br>76 | hsa-miR-34b-3p  | Endogenous<br>1 | 24   | 24  | 20   | 20   | 24   | 23   | 21   | 20   |
| MIMAT00046<br>77 | hsa-miR-34c-3p  | Endogenous<br>1 | 22   | 20  | 20   | 27   | 34   | 33   | 20   | 20   |
| MIMAT00006<br>86 | hsa-miR-34c-5p  | Endogenous<br>1 | 23   | 23  | 45   | 21   | 55   | 51   | 42   | 36   |
| MIMAT00179<br>82 | hsa-miR-3605-3p | Endogenous<br>1 | 20   | 26  | 20   | 22   | 28   | 49   | 39   | 20   |
| MIMAT00179<br>81 | hsa-miR-3605-5p | Endogenous<br>1 | 20   | 20  | 20   | 20   | 22   | 26   | 20   | 20   |
| MIMAT00046<br>82 | hsa-miR-361-3p  | Endogenous<br>1 | 231  | 36  | 55   | 92   | 46   | 156  | 126  | 125  |
| MIMAT00007<br>03 | hsa-miR-361-5p  | Endogenous<br>1 | 212  | 207 | 248  | 1225 | 1235 | 2054 | 2840 | 1095 |
| MIMAT00179<br>91 | hsa-miR-3613-3p | Endogenous<br>1 | 23   | 29  | 27   | 20   | 38   | 26   | 21   | 20   |
| MIMAT00179<br>90 | hsa-miR-3613-5p | Endogenous<br>1 | 20   | 23  | 20   | 20   | 20   | 20   | 20   | 20   |

|                  |                                 |                 |     |    |     |     |     |     |      |     |
|------------------|---------------------------------|-----------------|-----|----|-----|-----|-----|-----|------|-----|
| MIMAT00179<br>93 | hsa-miR-3614-3p                 | Endogenous<br>1 | 20  | 40 | 20  | 30  | 29  | 20  | 22   | 20  |
| MIMAT00179<br>92 | hsa-miR-3614-5p                 | Endogenous<br>1 | 20  | 22 | 23  | 20  | 20  | 22  | 21   | 20  |
| MIMAT00179<br>94 | hsa-miR-3615                    | Endogenous<br>1 | 20  | 29 | 20  | 27  | 27  | 20  | 20   | 22  |
| MIMAT00046<br>83 | hsa-miR-362-3p                  | Endogenous<br>1 | 66  | 36 | 177 | 253 | 250 | 259 | 536  | 146 |
| MIMAT00007<br>05 | hsa-miR-362-5p                  | Endogenous<br>1 | 61  | 91 | 69  | 516 | 270 | 541 | 192  | 68  |
| MIMAT00007<br>07 | hsa-miR-363-3p                  | Endogenous<br>1 | 44  | 46 | 22  | 322 | 82  | 46  | 8285 | 121 |
| MIMAT00033<br>85 | hsa-miR-363-5p                  | Endogenous<br>1 | 23  | 41 | 25  | 20  | 53  | 30  | 31   | 32  |
| MIMAT00007<br>10 | hsa-miR-365a-3p+hsa-miR-365b-3p | Endogenous<br>1 | 43  | 39 | 193 | 117 | 829 | 226 | 330  | 106 |
| MIMAT00228<br>33 | hsa-miR-365b-5p                 | Endogenous<br>1 | 20  | 25 | 27  | 20  | 30  | 20  | 25   | 20  |
| MIMAT00007<br>19 | hsa-miR-367-3p                  | Endogenous<br>1 | 33  | 34 | 27  | 20  | 36  | 20  | 20   | 22  |
| MIMAT00007<br>21 | hsa-miR-369-3p                  | Endogenous<br>1 | 63  | 37 | 33  | 34  | 42  | 23  | 40   | 26  |
| MIMAT00016<br>21 | hsa-miR-369-5p                  | Endogenous<br>1 | 20  | 20 | 20  | 20  | 20  | 20  | 20   | 20  |
| MIMAT00181<br>19 | hsa-miR-3690                    | Endogenous<br>1 | 27  | 43 | 47  | 20  | 41  | 20  | 30   | 34  |
| MIMAT00007<br>22 | hsa-miR-370-3p                  | Endogenous<br>1 | 237 | 24 | 20  | 20  | 20  | 38  | 59   | 135 |
| MIMAT00264<br>83 | hsa-miR-370-5p                  | Endogenous<br>1 | 20  | 26 | 20  | 20  | 26  | 20  | 20   | 20  |



|                  |                   |                 |      |     |      |      |      |      |       |      |
|------------------|-------------------|-----------------|------|-----|------|------|------|------|-------|------|
| MIMAT00046<br>87 | hsa-miR-371a-5p   | Endogenous<br>1 | 20   | 27  | 20   | 26   | 23   | 23   | 24    | 20   |
| MIMAT00198<br>92 | hsa-miR-371b-5p   | Endogenous<br>1 | 20   | 20  | 20   | 20   | 20   | 20   | 20    | 20   |
| MIMAT00007<br>24 | hsa-miR-372-3p    | Endogenous<br>1 | 20   | 20  | 20   | 20   | 24   | 28   | 20    | 20   |
| MIMAT00007<br>26 | hsa-miR-373-3p    | Endogenous<br>1 | 20   | 20  | 20   | 20   | 20   | 20   | 20    | 20   |
| MIMAT00046<br>88 | hsa-miR-374a-3p   | Endogenous<br>1 | 20   | 23  | 26   | 22   | 26   | 28   | 20    | 20   |
| MIMAT00007<br>27 | hsa-miR-374a-5p   | Endogenous<br>1 | 944  | 847 | 2217 | 1947 | 2752 | 3007 | 14142 | 7680 |
| MIMAT00049<br>55 | hsa-miR-374b-5p   | Endogenous<br>1 | 198  | 102 | 116  | 427  | 709  | 666  | 2671  | 670  |
| MIMAT00184<br>43 | hsa-miR-374c-5p   | Endogenous<br>1 | 20   | 20  | 20   | 20   | 20   | 20   | 20    | 71   |
| MIMAT00007<br>28 | hsa-miR-375       | Endogenous<br>1 | 20   | 21  | 20   | 20   | 25   | 20   | 20    | 20   |
| MIMAT00229<br>28 | hsa-miR-376a-2-5p | Endogenous<br>1 | 29   | 20  | 26   | 20   | 34   | 24   | 29    | 21   |
| MIMAT00007<br>29 | hsa-miR-376a-3p   | Endogenous<br>1 | 3166 | 42  | 36   | 36   | 77   | 112  | 781   | 4259 |
| MIMAT00021<br>72 | hsa-miR-376b-3p   | Endogenous<br>1 | 153  | 20  | 20   | 20   | 20   | 20   | 30    | 231  |
| MIMAT00007<br>20 | hsa-miR-376c-3p   | Endogenous<br>1 | 932  | 20  | 20   | 20   | 33   | 45   | 234   | 1389 |
| MIMAT00228<br>61 | hsa-miR-376c-5p   | Endogenous<br>1 | 22   | 31  | 20   | 20   | 21   | 23   | 20    | 20   |
| MIMAT00007<br>30 | hsa-miR-377-3p    | Endogenous<br>1 | 284  | 25  | 25   | 21   | 20   | 29   | 302   | 2101 |

|                  |                |                 |      |     |    |    |     |    |     |     |
|------------------|----------------|-----------------|------|-----|----|----|-----|----|-----|-----|
| MIMAT00149<br>99 | hsa-miR-378b   | Endogenous<br>1 | 20   | 20  | 20 | 20 | 20  | 20 | 20  | 20  |
| MIMAT00168<br>47 | hsa-miR-378c   | Endogenous<br>1 | 20   | 20  | 20 | 20 | 20  | 20 | 20  | 20  |
| MIMAT00189<br>26 | hsa-miR-378d   | Endogenous<br>1 | 20   | 20  | 20 | 20 | 20  | 20 | 20  | 20  |
| MIMAT00189<br>27 | hsa-miR-378e   | Endogenous<br>1 | 20   | 20  | 20 | 20 | 20  | 20 | 20  | 20  |
| MIMAT00189<br>32 | hsa-miR-378f   | Endogenous<br>1 | 38   | 36  | 32 | 54 | 81  | 49 | 27  | 20  |
| MIMAT00189<br>37 | hsa-miR-378g   | Endogenous<br>1 | 1037 | 65  | 88 | 31 | 66  | 34 | 84  | 20  |
| MIMAT00189<br>84 | hsa-miR-378h   | Endogenous<br>1 | 46   | 65  | 68 | 67 | 45  | 73 | 34  | 38  |
| MIMAT00190<br>74 | hsa-miR-378i   | Endogenous<br>1 | 1913 | 168 | 75 | 58 | 117 | 44 | 120 | 30  |
| MIMAT00007<br>33 | hsa-miR-379-5p | Endogenous<br>1 | 612  | 22  | 20 | 20 | 31  | 60 | 67  | 202 |
| MIMAT00007<br>35 | hsa-miR-380-3p | Endogenous<br>1 | 20   | 20  | 20 | 20 | 28  | 24 | 20  | 20  |
| MIMAT00007<br>36 | hsa-miR-381-3p | Endogenous<br>1 | 250  | 20  | 20 | 20 | 23  | 29 | 95  | 305 |
| MIMAT00228<br>62 | hsa-miR-381-5p | Endogenous<br>1 | 44   | 37  | 20 | 20 | 33  | 20 | 20  | 23  |
| MIMAT00226<br>97 | hsa-miR-382-3p | Endogenous<br>1 | 27   | 36  | 28 | 25 | 24  | 20 | 20  | 20  |
| MIMAT00007<br>37 | hsa-miR-382-5p | Endogenous<br>1 | 1351 | 20  | 24 | 22 | 37  | 66 | 134 | 167 |
| MIMAT00007<br>38 | hsa-miR-383-5p | Endogenous<br>1 | 20   | 31  | 44 | 20 | 20  | 20 | 20  | 20  |

|                  |                 |                 |     |    |     |     |     |     |      |     |
|------------------|-----------------|-----------------|-----|----|-----|-----|-----|-----|------|-----|
| MIMAT00010<br>75 | hsa-miR-384     | Endogenous<br>1 | 20  | 20 | 20  | 20  | 20  | 20  | 20   | 20  |
| MIMAT00181<br>90 | hsa-miR-3916    | Endogenous<br>1 | 20  | 30 | 20  | 27  | 24  | 22  | 22   | 20  |
| MIMAT00181<br>92 | hsa-miR-3918    | Endogenous<br>1 | 20  | 32 | 35  | 20  | 22  | 31  | 20   | 20  |
| MIMAT00182<br>05 | hsa-miR-3928-3p | Endogenous<br>1 | 20  | 20 | 20  | 25  | 21  | 22  | 20   | 20  |
| MIMAT00183<br>49 | hsa-miR-3934-5p | Endogenous<br>1 | 20  | 24 | 34  | 30  | 36  | 42  | 27   | 20  |
| MIMAT00016<br>39 | hsa-miR-409-3p  | Endogenous<br>1 | 436 | 20 | 20  | 20  | 23  | 38  | 77   | 206 |
| MIMAT00016<br>38 | hsa-miR-409-5p  | Endogenous<br>1 | 104 | 24 | 20  | 20  | 25  | 32  | 61   | 88  |
| MIMAT00021<br>71 | hsa-miR-410-3p  | Endogenous<br>1 | 119 | 34 | 20  | 27  | 24  | 23  | 44   | 38  |
| MIMAT00033<br>29 | hsa-miR-411-5p  | Endogenous<br>1 | 695 | 61 | 37  | 47  | 53  | 77  | 132  | 291 |
| MIMAT00021<br>70 | hsa-miR-412-3p  | Endogenous<br>1 | 36  | 36 | 21  | 28  | 36  | 34  | 21   | 20  |
| MIMAT00033<br>39 | hsa-miR-421     | Endogenous<br>1 | 57  | 86 | 73  | 308 | 558 | 437 | 1711 | 100 |
| MIMAT00013<br>39 | hsa-miR-422a    | Endogenous<br>1 | 20  | 20 | 20  | 20  | 20  | 20  | 20   | 20  |
| MIMAT00013<br>40 | hsa-miR-423-3p  | Endogenous<br>1 | 64  | 20 | 72  | 233 | 232 | 306 | 421  | 85  |
| MIMAT00047<br>48 | hsa-miR-423-5p  | Endogenous<br>1 | 168 | 64 | 103 | 347 | 486 | 472 | 547  | 210 |
| MIMAT00013<br>41 | hsa-miR-424-5p  | Endogenous<br>1 | 26  | 20 | 26  | 27  | 25  | 101 | 114  | 466 |

|                  |                |                 |     |     |     |     |     |     |     |     |
|------------------|----------------|-----------------|-----|-----|-----|-----|-----|-----|-----|-----|
| MIMAT00033<br>93 | hsa-miR-425-5p | Endogenous<br>1 | 232 | 24  | 85  | 340 | 135 | 173 | 508 | 118 |
| MIMAT00169<br>15 | hsa-miR-4284   | Endogenous<br>1 | 31  | 29  | 35  | 76  | 55  | 122 | 53  | 130 |
| MIMAT00169<br>16 | hsa-miR-4286   | Endogenous<br>1 | 45  | 49  | 404 | 246 | 364 | 232 | 302 | 406 |
| MIMAT00015<br>36 | hsa-miR-429    | Endogenous<br>1 | 20  | 20  | 20  | 20  | 20  | 20  | 20  | 51  |
| MIMAT00016<br>25 | hsa-miR-431-5p | Endogenous<br>1 | 354 | 20  | 20  | 20  | 23  | 24  | 56  | 54  |
| MIMAT00028<br>14 | hsa-miR-432-5p | Endogenous<br>1 | 164 | 25  | 20  | 20  | 21  | 24  | 36  | 31  |
| MIMAT00016<br>27 | hsa-miR-433-3p | Endogenous<br>1 | 167 | 28  | 25  | 24  | 39  | 43  | 46  | 20  |
| MIMAT00265<br>54 | hsa-miR-433-5p | Endogenous<br>1 | 20  | 20  | 26  | 23  | 29  | 21  | 20  | 20  |
| MIMAT00189<br>34 | hsa-miR-4421   | Endogenous<br>1 | 20  | 36  | 29  | 20  | 40  | 28  | 20  | 20  |
| MIMAT00189<br>40 | hsa-miR-4425   | Endogenous<br>1 | 20  | 34  | 20  | 20  | 21  | 21  | 29  | 20  |
| MIMAT00189<br>47 | hsa-miR-4431   | Endogenous<br>1 | 20  | 26  | 20  | 20  | 20  | 20  | 20  | 20  |
| MIMAT00189<br>51 | hsa-miR-4435   | Endogenous<br>1 | 20  | 20  | 20  | 20  | 24  | 21  | 20  | 23  |
| MIMAT00189<br>61 | hsa-miR-4443   | Endogenous<br>1 | 380 | 435 | 146 | 316 | 333 | 438 | 761 | 428 |
| MIMAT00189<br>67 | hsa-miR-4448   | Endogenous<br>1 | 20  | 20  | 20  | 20  | 20  | 20  | 20  | 20  |
| MIMAT00189<br>73 | hsa-miR-4451   | Endogenous<br>1 | 26  | 33  | 20  | 24  | 22  | 29  | 20  | 20  |

|                  |                           |                 |      |          |            |      |       |      |       |            |
|------------------|---------------------------|-----------------|------|----------|------------|------|-------|------|-------|------------|
| MIMAT00189<br>76 | hsa-miR-4454+hsa-miR-7975 | Endogenous<br>1 | 4371 | 635<br>5 | 10006<br>5 | 7216 | 14649 | 4730 | 23255 | 59920<br>1 |
| MIMAT00189<br>77 | hsa-miR-4455              | Endogenous<br>1 | 148  | 280      | 56         | 184  | 418   | 169  | 69    | 85         |
| MIMAT00189<br>80 | hsa-miR-4458              | Endogenous<br>1 | 20   | 25       | 21         | 20   | 21    | 20   | 20    | 34         |
| MIMAT00189<br>83 | hsa-miR-4461              | Endogenous<br>1 | 31   | 37       | 35         | 30   | 48    | 45   | 20    | 20         |
| MIMAT00015<br>32 | hsa-miR-448               | Endogenous<br>1 | 28   | 27       | 24         | 20   | 40    | 36   | 27    | 20         |
| MIMAT00190<br>19 | hsa-miR-4485-3p           | Endogenous<br>1 | 70   | 33       | 31         | 91   | 54    | 113  | 117   | 25         |
| MIMAT00190<br>22 | hsa-miR-4488              | Endogenous<br>1 | 28   | 115      | 48         | 26   | 56    | 25   | 394   | 70         |
| MIMAT00015<br>41 | hsa-miR-449a              | Endogenous<br>1 | 20   | 23       | 20         | 20   | 20    | 28   | 121   | 20         |
| MIMAT00033<br>27 | hsa-miR-449b-5p           | Endogenous<br>1 | 20   | 20       | 25         | 20   | 26    | 20   | 26    | 20         |
| MIMAT00102<br>51 | hsa-miR-449c-5p           | Endogenous<br>1 | 27   | 23       | 20         | 20   | 21    | 20   | 20    | 20         |
| MIMAT00227<br>00 | hsa-miR-450a-1-3p         | Endogenous<br>1 | 23   | 31       | 31         | 22   | 25    | 30   | 20    | 25         |
| MIMAT00310<br>74 | hsa-miR-450a-2-3p         | Endogenous<br>1 | 27   | 36       | 34         | 20   | 47    | 36   | 22    | 22         |
| MIMAT00015<br>45 | hsa-miR-450a-5p           | Endogenous<br>1 | 30   | 39       | 20         | 27   | 54    | 107  | 182   | 294        |
| MIMAT00049<br>10 | hsa-miR-450b-3p           | Endogenous<br>1 | 21   | 20       | 20         | 24   | 20    | 20   | 23    | 20         |
| MIMAT00049<br>09 | hsa-miR-450b-5p           | Endogenous<br>1 | 23   | 22       | 22         | 20   | 40    | 37   | 23    | 20         |

|                  |                  |                 |     |    |     |     |     |     |      |     |
|------------------|------------------|-----------------|-----|----|-----|-----|-----|-----|------|-----|
| MIMAT00190<br>53 | hsa-miR-4516     | Endogenous<br>1 | 25  | 37 | 20  | 20  | 50  | 24  | 40   | 37  |
| MIMAT00016<br>31 | hsa-miR-451a     | Endogenous<br>1 | 20  | 26 | 22  | 20  | 22  | 31  | 20   | 20  |
| MIMAT00016<br>35 | hsa-miR-452-5p   | Endogenous<br>1 | 20  | 20 | 20  | 20  | 20  | 20  | 29   | 20  |
| MIMAT00190<br>58 | hsa-miR-4521     | Endogenous<br>1 | 20  | 28 | 35  | 20  | 35  | 20  | 21   | 113 |
| MIMAT00190<br>62 | hsa-miR-4524a-5p | Endogenous<br>1 | 20  | 20 | 24  | 20  | 28  | 20  | 20   | 20  |
| MIMAT00190<br>70 | hsa-miR-4531     | Endogenous<br>1 | 43  | 42 | 20  | 44  | 89  | 47  | 26   | 38  |
| MIMAT00190<br>71 | hsa-miR-4532     | Endogenous<br>1 | 20  | 29 | 22  | 20  | 40  | 21  | 57   | 51  |
| MIMAT00209<br>59 | hsa-miR-4536-3p  | Endogenous<br>1 | 20  | 29 | 20  | 20  | 29  | 27  | 22   | 20  |
| MIMAT00190<br>78 | hsa-miR-4536-5p  | Endogenous<br>1 | 44  | 31 | 28  | 33  | 46  | 34  | 20   | 20  |
| MIMAT00038<br>85 | hsa-miR-454-3p   | Endogenous<br>1 | 108 | 30 | 37  | 211 | 179 | 319 | 1037 | 39  |
| MIMAT00047<br>84 | hsa-miR-455-3p   | Endogenous<br>1 | 20  | 20 | 22  | 28  | 25  | 20  | 122  | 22  |
| MIMAT00031<br>50 | hsa-miR-455-5p   | Endogenous<br>1 | 20  | 20 | 158 | 20  | 24  | 22  | 169  | 393 |
| MIMAT00197<br>09 | hsa-miR-4647     | Endogenous<br>1 | 24  | 35 | 20  | 26  | 31  | 30  | 20   | 20  |
| MIMAT00198<br>08 | hsa-miR-4707-3p  | Endogenous<br>1 | 25  | 27 | 20  | 20  | 36  | 22  | 20   | 20  |
| MIMAT00198<br>07 | hsa-miR-4707-5p  | Endogenous<br>1 | 33  | 40 | 33  | 27  | 41  | 37  | 27   | 30  |



|              |                 |              |     |    |    |     |     |     |     |     |
|--------------|-----------------|--------------|-----|----|----|-----|-----|-----|-----|-----|
| MIMAT0002805 | hsa-miR-489-3p  | Endogenous 1 | 20  | 20 | 20 | 20  | 21  | 27  | 23  | 20  |
| MIMAT0002806 | hsa-miR-490-3p  | Endogenous 1 | 20  | 20 | 20 | 20  | 20  | 20  | 20  | 20  |
| MIMAT0004764 | hsa-miR-490-5p  | Endogenous 1 | 20  | 32 | 20 | 20  | 22  | 20  | 20  | 20  |
| MIMAT0004765 | hsa-miR-491-3p  | Endogenous 1 | 20  | 20 | 20 | 20  | 20  | 20  | 20  | 20  |
| MIMAT0002807 | hsa-miR-491-5p  | Endogenous 1 | 20  | 29 | 34 | 28  | 21  | 33  | 110 | 43  |
| MIMAT0002812 | hsa-miR-492     | Endogenous 1 | 20  | 21 | 20 | 20  | 20  | 20  | 20  | 27  |
| MIMAT0003161 | hsa-miR-493-3p  | Endogenous 1 | 67  | 23 | 44 | 20  | 20  | 20  | 20  | 335 |
| MIMAT0002816 | hsa-miR-494-3p  | Endogenous 1 | 20  | 20 | 20 | 20  | 20  | 20  | 20  | 20  |
| MIMAT0026607 | hsa-miR-494-5p  | Endogenous 1 | 20  | 22 | 20 | 20  | 20  | 20  | 26  | 20  |
| MIMAT0002817 | hsa-miR-495-3p  | Endogenous 1 | 777 | 22 | 28 | 25  | 26  | 52  | 141 | 131 |
| MIMAT0022924 | hsa-miR-495-5p  | Endogenous 1 | 59  | 33 | 27 | 26  | 43  | 25  | 28  | 27  |
| MIMAT0002818 | hsa-miR-496     | Endogenous 1 | 20  | 20 | 20 | 20  | 20  | 20  | 20  | 20  |
| MIMAT0002820 | hsa-miR-497-5p  | Endogenous 1 | 29  | 26 | 87 | 579 | 39  | 184 | 56  | 549 |
| MIMAT0002824 | hsa-miR-498     | Endogenous 1 | 33  | 50 | 43 | 43  | 60  | 42  | 30  | 24  |
| MIMAT0004772 | hsa-miR-499a-3p | Endogenous 1 | 32  | 26 | 20 | 60  | 124 | 62  | 20  | 20  |





|                  |                  |                 |    |     |    |    |     |    |     |    |
|------------------|------------------|-----------------|----|-----|----|----|-----|----|-----|----|
| MIMAT00028<br>76 | hsa-miR-505-3p   | Endogenous<br>1 | 20 | 20  | 28 | 56 | 20  | 36 | 109 | 31 |
| MIMAT00028<br>78 | hsa-miR-506-3p   | Endogenous<br>1 | 20 | 20  | 20 | 20 | 20  | 20 | 20  | 20 |
| MIMAT00227<br>01 | hsa-miR-506-5p   | Endogenous<br>1 | 20 | 45  | 32 | 30 | 32  | 30 | 22  | 20 |
| MIMAT00028<br>79 | hsa-miR-507      | Endogenous<br>1 | 20 | 20  | 20 | 20 | 20  | 20 | 20  | 20 |
| MIMAT00028<br>80 | hsa-miR-508-3p   | Endogenous<br>1 | 29 | 41  | 23 | 49 | 116 | 51 | 20  | 20 |
| MIMAT00047<br>78 | hsa-miR-508-5p   | Endogenous<br>1 | 20 | 20  | 20 | 20 | 20  | 20 | 20  | 20 |
| MIMAT00049<br>75 | hsa-miR-509-3-5p | Endogenous<br>1 | 20 | 20  | 20 | 20 | 20  | 20 | 20  | 20 |
| MIMAT00028<br>81 | hsa-miR-509-3p   | Endogenous<br>1 | 20 | 20  | 20 | 21 | 20  | 31 | 20  | 20 |
| MIMAT00047<br>79 | hsa-miR-509-5p   | Endogenous<br>1 | 20 | 25  | 20 | 21 | 25  | 20 | 21  | 20 |
| MIMAT00266<br>13 | hsa-miR-510-3p   | Endogenous<br>1 | 34 | 25  | 20 | 20 | 39  | 30 | 22  | 25 |
| MIMAT00028<br>82 | hsa-miR-510-5p   | Endogenous<br>1 | 20 | 25  | 20 | 22 | 26  | 21 | 20  | 20 |
| MIMAT00028<br>08 | hsa-miR-511-5p   | Endogenous<br>1 | 20 | 20  | 20 | 20 | 20  | 20 | 20  | 20 |
| MIMAT00028<br>23 | hsa-miR-512-3p   | Endogenous<br>1 | 20 | 20  | 20 | 20 | 20  | 20 | 42  | 20 |
| MIMAT00028<br>22 | hsa-miR-512-5p   | Endogenous<br>1 | 20 | 31  | 21 | 20 | 20  | 25 | 20  | 20 |
| MIMAT00047<br>77 | hsa-miR-513a-3p  | Endogenous<br>1 | 20 | 100 | 20 | 20 | 36  | 33 | 25  | 46 |



|                  |                                                                                               |                 |    |    |    |    |    |    |    |    |
|------------------|-----------------------------------------------------------------------------------------------|-----------------|----|----|----|----|----|----|----|----|
| MIMAT00028<br>66 | hsa-miR-517c-3p+hsa-miR-519a-3p                                                               | Endogenous<br>1 | 22 | 20 | 20 | 20 | 36 | 27 | 20 | 20 |
| MIMAT00028<br>44 | hsa-miR-518b                                                                                  | Endogenous<br>1 | 22 | 20 | 20 | 20 | 25 | 20 | 20 | 29 |
| MIMAT00028<br>48 | hsa-miR-518c-3p                                                                               | Endogenous<br>1 | 20 | 20 | 20 | 20 | 20 | 20 | 20 | 20 |
| MIMAT00028<br>64 | hsa-miR-518d-3p                                                                               | Endogenous<br>1 | 20 | 20 | 20 | 20 | 20 | 20 | 20 | 20 |
| MIMAT00028<br>61 | hsa-miR-518e-3p                                                                               | Endogenous<br>1 | 20 | 30 | 20 | 20 | 37 | 29 | 20 | 20 |
| MIMAT00028<br>42 | hsa-miR-518f-3p                                                                               | Endogenous<br>1 | 20 | 20 | 22 | 20 | 30 | 23 | 20 | 20 |
| MIMAT00211<br>29 | hsa-miR-5196-3p+hsa-miR-6732-3p                                                               | Endogenous<br>1 | 42 | 22 | 21 | 42 | 30 | 48 | 20 | 20 |
| MIMAT00211<br>28 | hsa-miR-5196-5p                                                                               | Endogenous<br>1 | 20 | 29 | 20 | 22 | 34 | 21 | 20 | 20 |
| MIMAT00028<br>37 | hsa-miR-519b-3p                                                                               | Endogenous<br>1 | 20 | 25 | 20 | 20 | 28 | 20 | 20 | 20 |
| MIMAT00054<br>54 | hsa-miR-519b-5p+hsa-miR-519c-5p+hsa-miR-523-5p+hsa-miR-518e-5p+hsa-miR-522-5p+hsa-miR-519a-5p | Endogenous<br>1 | 20 | 30 | 20 | 20 | 37 | 31 | 20 | 23 |
| MIMAT00028<br>32 | hsa-miR-519c-3p                                                                               | Endogenous<br>1 | 20 | 20 | 20 | 20 | 20 | 20 | 20 | 20 |
| MIMAT00028<br>53 | hsa-miR-519d-3p                                                                               | Endogenous<br>1 | 20 | 20 | 20 | 26 | 22 | 20 | 20 | 20 |
| MIMAT00028<br>29 | hsa-miR-519e-3p                                                                               | Endogenous<br>1 | 20 | 30 | 20 | 20 | 22 | 20 | 20 | 34 |
| MIMAT00028<br>34 | hsa-miR-520a-3p                                                                               | Endogenous<br>1 | 20 | 21 | 20 | 20 | 22 | 20 | 23 | 20 |

|                  |                                             |                 |    |    |    |    |    |    |    |    |
|------------------|---------------------------------------------|-----------------|----|----|----|----|----|----|----|----|
| MIMAT00028<br>33 | hsa-miR-520a-5p                             | Endogenous<br>1 | 20 | 20 | 20 | 20 | 22 | 23 | 20 | 20 |
| MIMAT00028<br>43 | hsa-miR-520b                                | Endogenous<br>1 | 20 | 20 | 20 | 20 | 23 | 21 | 24 | 20 |
| MIMAT00028<br>46 | hsa-miR-520c-3p                             | Endogenous<br>1 | 20 | 20 | 20 | 20 | 25 | 20 | 20 | 20 |
| MIMAT00028<br>56 | hsa-miR-520d-3p                             | Endogenous<br>1 | 27 | 20 | 20 | 23 | 76 | 29 | 20 | 20 |
| MIMAT00028<br>55 | hsa-miR-520d-5p+hsa-miR-527+hsa-miR-518a-5p | Endogenous<br>1 | 23 | 41 | 25 | 39 | 49 | 51 | 33 | 20 |
| MIMAT00028<br>25 | hsa-miR-520e                                | Endogenous<br>1 | 20 | 20 | 20 | 20 | 20 | 20 | 20 | 20 |
| MIMAT00028<br>30 | hsa-miR-520f-3p                             | Endogenous<br>1 | 26 | 37 | 25 | 34 | 58 | 26 | 23 | 39 |
| MIMAT00028<br>58 | hsa-miR-520g-3p                             | Endogenous<br>1 | 27 | 20 | 20 | 20 | 20 | 20 | 20 | 20 |
| MIMAT00028<br>67 | hsa-miR-520h                                | Endogenous<br>1 | 55 | 38 | 21 | 26 | 32 | 33 | 25 | 20 |
| MIMAT00028<br>54 | hsa-miR-521                                 | Endogenous<br>1 | 20 | 20 | 22 | 20 | 29 | 31 | 21 | 20 |
| MIMAT00028<br>68 | hsa-miR-522-3p                              | Endogenous<br>1 | 21 | 20 | 23 | 31 | 59 | 27 | 22 | 20 |
| MIMAT00028<br>40 | hsa-miR-523-3p                              | Endogenous<br>1 | 21 | 42 | 27 | 20 | 22 | 25 | 20 | 27 |
| MIMAT00028<br>50 | hsa-miR-524-3p                              | Endogenous<br>1 | 20 | 31 | 30 | 20 | 25 | 20 | 20 | 38 |
| MIMAT00028<br>39 | hsa-miR-525-3p                              | Endogenous<br>1 | 20 | 34 | 20 | 20 | 50 | 20 | 20 | 20 |
| MIMAT00028<br>38 | hsa-miR-525-5p                              | Endogenous<br>1 | 36 | 51 | 40 | 69 | 46 | 75 | 24 | 20 |

|                  |                                              |                 |      |    |     |     |     |     |     |     |
|------------------|----------------------------------------------|-----------------|------|----|-----|-----|-----|-----|-----|-----|
| MIMAT00028<br>45 | hsa-miR-526a+hsa-miR-518c-5p+hsa-miR-518d-5p | Endogenous<br>1 | 24   | 30 | 30  | 26  | 35  | 29  | 20  | 33  |
| MIMAT00028<br>35 | hsa-miR-526b-5p                              | Endogenous<br>1 | 20   | 37 | 20  | 21  | 48  | 34  | 23  | 20  |
| MIMAT00047<br>80 | hsa-miR-532-3p                               | Endogenous<br>1 | 23   | 29 | 31  | 51  | 69  | 68  | 57  | 20  |
| MIMAT00028<br>88 | hsa-miR-532-5p                               | Endogenous<br>1 | 43   | 38 | 61  | 239 | 157 | 216 | 194 | 65  |
| MIMAT00227<br>05 | hsa-miR-539-3p                               | Endogenous<br>1 | 20   | 24 | 20  | 20  | 23  | 20  | 20  | 21  |
| MIMAT00031<br>63 | hsa-miR-539-5p                               | Endogenous<br>1 | 73   | 32 | 63  | 20  | 28  | 20  | 35  | 405 |
| MIMAT00049<br>20 | hsa-miR-541-3p                               | Endogenous<br>1 | 20   | 20 | 20  | 20  | 20  | 20  | 20  | 20  |
| MIMAT00033<br>89 | hsa-miR-542-3p                               | Endogenous<br>1 | 22   | 26 | 23  | 21  | 52  | 28  | 35  | 48  |
| MIMAT00033<br>40 | hsa-miR-542-5p                               | Endogenous<br>1 | 26   | 25 | 20  | 24  | 55  | 39  | 23  | 20  |
| MIMAT00049<br>54 | hsa-miR-543                                  | Endogenous<br>1 | 1548 | 34 | 31  | 36  | 61  | 105 | 219 | 179 |
| MIMAT00031<br>64 | hsa-miR-544a                                 | Endogenous<br>1 | 20   | 20 | 20  | 20  | 20  | 20  | 24  | 20  |
| MIMAT00031<br>65 | hsa-miR-545-3p                               | Endogenous<br>1 | 20   | 33 | 130 | 23  | 23  | 20  | 161 | 44  |
| MIMAT00032<br>51 | hsa-miR-548a-3p                              | Endogenous<br>1 | 20   | 31 | 54  | 25  | 36  | 22  | 63  | 29  |
| MIMAT00048<br>03 | hsa-miR-548a-5p                              | Endogenous<br>1 | 20   | 21 | 20  | 20  | 20  | 22  | 20  | 20  |
| MIMAT00184<br>47 | hsa-miR-548aa+hsa-miR-548t-3p                | Endogenous<br>1 | 20   | 44 | 20  | 196 | 967 | 50  | 20  | 20  |

|                  |                                                  |                 |    |    |     |    |     |     |     |     |
|------------------|--------------------------------------------------|-----------------|----|----|-----|----|-----|-----|-----|-----|
| MIMAT00189<br>46 | hsa-miR-548ad-3p                                 | Endogenous<br>1 | 41 | 52 | 32  | 34 | 35  | 48  | 20  | 20  |
| MIMAT00189<br>72 | hsa-miR-548ah-5p                                 | Endogenous<br>1 | 44 | 60 | 47  | 72 | 105 | 74  | 28  | 32  |
| MIMAT00189<br>89 | hsa-miR-548ai+hsa-miR-570-5p                     | Endogenous<br>1 | 31 | 25 | 20  | 20 | 39  | 26  | 20  | 20  |
| MIMAT00190<br>13 | hsa-miR-548ak                                    | Endogenous<br>1 | 20 | 28 | 20  | 20 | 43  | 26  | 20  | 20  |
| MIMAT00190<br>24 | hsa-miR-548al                                    | Endogenous<br>1 | 21 | 20 | 23  | 23 | 29  | 28  | 20  | 20  |
| MIMAT00222<br>66 | hsa-miR-548ar-3p                                 | Endogenous<br>1 | 31 | 56 | 31  | 36 | 43  | 45  | 29  | 22  |
| MIMAT00222<br>65 | hsa-miR-548ar-5p                                 | Endogenous<br>1 | 20 | 20 | 20  | 20 | 20  | 20  | 20  | 20  |
| MIMAT00032<br>54 | hsa-miR-548b-3p                                  | Endogenous<br>1 | 20 | 20 | 79  | 71 | 64  | 112 | 137 | 131 |
| MIMAT00048<br>06 | hsa-miR-548c-5p+hsa-miR-548o-5p+hsa-miR-548am-5p | Endogenous<br>1 | 20 | 22 | 20  | 20 | 20  | 20  | 20  | 20  |
| MIMAT00033<br>23 | hsa-miR-548d-3p                                  | Endogenous<br>1 | 20 | 32 | 25  | 32 | 51  | 52  | 38  | 20  |
| MIMAT00048<br>12 | hsa-miR-548d-5p                                  | Endogenous<br>1 | 31 | 37 | 130 | 21 | 29  | 36  | 45  | 37  |
| MIMAT00058<br>74 | hsa-miR-548e-3p                                  | Endogenous<br>1 | 20 | 22 | 20  | 20 | 20  | 20  | 20  | 20  |
| MIMAT00267<br>36 | hsa-miR-548e-5p                                  | Endogenous<br>1 | 33 | 46 | 46  | 58 | 60  | 42  | 47  | 26  |
| MIMAT00059<br>12 | hsa-miR-548g-3p                                  | Endogenous<br>1 | 24 | 20 | 34  | 26 | 59  | 31  | 28  | 20  |
| MIMAT00059<br>28 | hsa-miR-548h-5p                                  | Endogenous<br>1 | 20 | 21 | 20  | 20 | 20  | 26  | 143 | 20  |

|                  |                                                   |                 |    |    |    |    |     |    |     |     |
|------------------|---------------------------------------------------|-----------------|----|----|----|----|-----|----|-----|-----|
| MIMAT00059<br>35 | hsa-miR-548i                                      | Endogenous<br>1 | 22 | 20 | 20 | 20 | 28  | 35 | 30  | 20  |
| MIMAT00267<br>37 | hsa-miR-548j-3p                                   | Endogenous<br>1 | 38 | 39 | 38 | 36 | 100 | 30 | 20  | 29  |
| MIMAT00058<br>75 | hsa-miR-548j-5p                                   | Endogenous<br>1 | 24 | 32 | 20 | 21 | 38  | 22 | 20  | 20  |
| MIMAT00058<br>82 | hsa-miR-548k                                      | Endogenous<br>1 | 34 | 41 | 20 | 22 | 36  | 35 | 29  | 29  |
| MIMAT00058<br>89 | hsa-miR-548l                                      | Endogenous<br>1 | 25 | 44 | 21 | 27 | 41  | 36 | 24  | 24  |
| MIMAT00059<br>17 | hsa-miR-548m                                      | Endogenous<br>1 | 37 | 34 | 25 | 20 | 39  | 22 | 22  | 20  |
| MIMAT00059<br>16 | hsa-miR-548n                                      | Endogenous<br>1 | 51 | 38 | 45 | 97 | 141 | 83 | 20  | 39  |
| MIMAT00059<br>19 | hsa-miR-548o-3p+hsa-miR-548ah-3p+hsa-miR-548av-3p | Endogenous<br>1 | 20 | 28 | 22 | 20 | 20  | 23 | 20  | 20  |
| MIMAT00111<br>63 | hsa-miR-548q                                      | Endogenous<br>1 | 61 | 54 | 32 | 40 | 78  | 30 | 51  | 20  |
| MIMAT00150<br>20 | hsa-miR-548v                                      | Endogenous<br>1 | 34 | 44 | 21 | 39 | 69  | 41 | 26  | 25  |
| MIMAT00183<br>54 | hsa-miR-548y                                      | Endogenous<br>1 | 32 | 38 | 28 | 32 | 48  | 47 | 90  | 23  |
| MIMAT00184<br>46 | hsa-miR-548z+hsa-miR-548h-3p                      | Endogenous<br>1 | 41 | 41 | 31 | 49 | 153 | 57 | 20  | 20  |
| MIMAT00033<br>33 | hsa-miR-549a                                      | Endogenous<br>1 | 33 | 38 | 27 | 41 | 58  | 34 | 23  | 20  |
| MIMAT00048<br>00 | hsa-miR-550a-5p                                   | Endogenous<br>1 | 20 | 25 | 20 | 28 | 23  | 20 | 20  | 20  |
| MIMAT00032<br>14 | hsa-miR-551a                                      | Endogenous<br>1 | 64 | 82 | 90 | 28 | 54  | 50 | 162 | 129 |



|                  |                 |                 |    |    |     |     |    |    |      |    |
|------------------|-----------------|-----------------|----|----|-----|-----|----|----|------|----|
| MIMAT00032<br>33 | hsa-miR-551b-3p | Endogenous<br>1 | 34 | 60 | 311 | 282 | 63 | 69 | 3216 | 81 |
| MIMAT00032<br>15 | hsa-miR-552-3p  | Endogenous<br>1 | 20 | 45 | 23  | 32  | 51 | 27 | 21   | 20 |
| MIMAT00032<br>16 | hsa-miR-553     | Endogenous<br>1 | 21 | 37 | 25  | 24  | 30 | 25 | 20   | 20 |
| MIMAT00032<br>17 | hsa-miR-554     | Endogenous<br>1 | 22 | 26 | 20  | 20  | 24 | 20 | 20   | 20 |
| MIMAT00032<br>19 | hsa-miR-555     | Endogenous<br>1 | 21 | 20 | 20  | 28  | 27 | 23 | 20   | 20 |
| MIMAT00047<br>93 | hsa-miR-556-3p  | Endogenous<br>1 | 20 | 27 | 28  | 28  | 29 | 20 | 20   | 24 |
| MIMAT00032<br>20 | hsa-miR-556-5p  | Endogenous<br>1 | 29 | 28 | 28  | 30  | 39 | 31 | 20   | 20 |
| MIMAT00032<br>25 | hsa-miR-561-3p  | Endogenous<br>1 | 20 | 31 | 20  | 20  | 20 | 20 | 20   | 20 |
| MIMAT00227<br>06 | hsa-miR-561-5p  | Endogenous<br>1 | 21 | 20 | 20  | 20  | 38 | 25 | 42   | 20 |
| MIMAT00032<br>26 | hsa-miR-562     | Endogenous<br>1 | 20 | 33 | 20  | 20  | 22 | 20 | 20   | 20 |
| MIMAT00032<br>27 | hsa-miR-563     | Endogenous<br>1 | 20 | 30 | 27  | 20  | 34 | 39 | 28   | 21 |
| MIMAT00032<br>28 | hsa-miR-564     | Endogenous<br>1 | 20 | 20 | 20  | 20  | 27 | 20 | 20   | 20 |
| MIMAT00032<br>30 | hsa-miR-566     | Endogenous<br>1 | 22 | 35 | 20  | 26  | 38 | 42 | 20   | 20 |
| MIMAT00032<br>31 | hsa-miR-567     | Endogenous<br>1 | 20 | 29 | 27  | 20  | 28 | 21 | 20   | 29 |
| MIMAT00032<br>32 | hsa-miR-568     | Endogenous<br>1 | 20 | 35 | 24  | 20  | 30 | 23 | 20   | 20 |

|                  |                |                 |    |     |     |     |     |     |     |    |
|------------------|----------------|-----------------|----|-----|-----|-----|-----|-----|-----|----|
| MIMAT00032<br>35 | hsa-miR-570-3p | Endogenous<br>1 | 20 | 20  | 20  | 20  | 20  | 20  | 20  | 20 |
| MIMAT00032<br>36 | hsa-miR-571    | Endogenous<br>1 | 20 | 20  | 20  | 20  | 23  | 26  | 20  | 20 |
| MIMAT00032<br>37 | hsa-miR-572    | Endogenous<br>1 | 23 | 27  | 20  | 23  | 30  | 33  | 20  | 20 |
| MIMAT00032<br>38 | hsa-miR-573    | Endogenous<br>1 | 23 | 30  | 20  | 20  | 35  | 28  | 20  | 20 |
| MIMAT00032<br>39 | hsa-miR-574-3p | Endogenous<br>1 | 41 | 38  | 145 | 213 | 52  | 40  | 240 | 91 |
| MIMAT00047<br>95 | hsa-miR-574-5p | Endogenous<br>1 | 53 | 110 | 60  | 164 | 161 | 102 | 87  | 57 |
| MIMAT00032<br>40 | hsa-miR-575    | Endogenous<br>1 | 37 | 54  | 30  | 37  | 100 | 55  | 49  | 77 |
| MIMAT00047<br>96 | hsa-miR-576-3p | Endogenous<br>1 | 20 | 20  | 20  | 70  | 33  | 33  | 20  | 20 |
| MIMAT00032<br>41 | hsa-miR-576-5p | Endogenous<br>1 | 20 | 31  | 79  | 20  | 27  | 21  | 20  | 23 |
| MIMAT00032<br>42 | hsa-miR-577    | Endogenous<br>1 | 20 | 20  | 20  | 28  | 23  | 44  | 61  | 20 |
| MIMAT00032<br>43 | hsa-miR-578    | Endogenous<br>1 | 20 | 38  | 20  | 20  | 21  | 20  | 25  | 35 |
| MIMAT00032<br>44 | hsa-miR-579-3p | Endogenous<br>1 | 20 | 20  | 20  | 20  | 20  | 20  | 20  | 20 |
| MIMAT00266<br>16 | hsa-miR-579-5p | Endogenous<br>1 | 20 | 20  | 20  | 20  | 24  | 35  | 20  | 20 |
| MIMAT00032<br>45 | hsa-miR-580-3p | Endogenous<br>1 | 20 | 39  | 20  | 20  | 20  | 20  | 20  | 20 |
| MIMAT00047<br>97 | hsa-miR-582-3p | Endogenous<br>1 | 63 | 41  | 31  | 113 | 393 | 103 | 34  | 20 |

|                  |                |                 |     |    |     |     |     |     |      |     |
|------------------|----------------|-----------------|-----|----|-----|-----|-----|-----|------|-----|
| MIMAT00032<br>47 | hsa-miR-582-5p | Endogenous<br>1 | 20  | 30 | 22  | 20  | 172 | 36  | 297  | 61  |
| MIMAT00227<br>08 | hsa-miR-584-3p | Endogenous<br>1 | 36  | 39 | 29  | 34  | 43  | 42  | 23   | 23  |
| MIMAT00032<br>49 | hsa-miR-584-5p | Endogenous<br>1 | 31  | 43 | 27  | 23  | 51  | 34  | 26   | 24  |
| MIMAT00032<br>50 | hsa-miR-585-3p | Endogenous<br>1 | 32  | 39 | 28  | 23  | 60  | 36  | 30   | 22  |
| MIMAT00032<br>53 | hsa-miR-587    | Endogenous<br>1 | 20  | 21 | 20  | 20  | 32  | 20  | 20   | 20  |
| MIMAT00047<br>99 | hsa-miR-589-5p | Endogenous<br>1 | 20  | 20 | 20  | 20  | 20  | 20  | 20   | 20  |
| MIMAT00048<br>01 | hsa-miR-590-3p | Endogenous<br>1 | 27  | 42 | 24  | 34  | 32  | 28  | 20   | 20  |
| MIMAT00032<br>58 | hsa-miR-590-5p | Endogenous<br>1 | 103 | 21 | 324 | 220 | 285 | 233 | 791  | 212 |
| MIMAT00032<br>59 | hsa-miR-591    | Endogenous<br>1 | 20  | 20 | 20  | 25  | 29  | 22  | 20   | 20  |
| MIMAT00032<br>60 | hsa-miR-592    | Endogenous<br>1 | 20  | 22 | 20  | 32  | 36  | 23  | 748  | 26  |
| MIMAT00048<br>02 | hsa-miR-593-3p | Endogenous<br>1 | 31  | 42 | 30  | 78  | 108 | 70  | 60   | 41  |
| MIMAT00032<br>63 | hsa-miR-595    | Endogenous<br>1 | 21  | 24 | 24  | 20  | 29  | 25  | 20   | 21  |
| MIMAT00032<br>64 | hsa-miR-596    | Endogenous<br>1 | 20  | 46 | 39  | 20  | 33  | 20  | 30   | 21  |
| MIMAT00032<br>65 | hsa-miR-597-5p | Endogenous<br>1 | 24  | 27 | 92  | 46  | 51  | 50  | 133  | 43  |
| MIMAT00032<br>66 | hsa-miR-598-3p | Endogenous<br>1 | 117 | 50 | 48  | 138 | 291 | 48  | 1331 | 155 |

|                  |                |                 |    |    |    |    |     |    |    |    |
|------------------|----------------|-----------------|----|----|----|----|-----|----|----|----|
| MIMAT00032<br>67 | hsa-miR-599    | Endogenous<br>1 | 26 | 20 | 20 | 20 | 20  | 20 | 21 | 20 |
| MIMAT00032<br>68 | hsa-miR-600    | Endogenous<br>1 | 20 | 20 | 20 | 20 | 20  | 20 | 20 | 20 |
| MIMAT00032<br>69 | hsa-miR-601    | Endogenous<br>1 | 20 | 56 | 20 | 20 | 22  | 24 | 29 | 24 |
| MIMAT00032<br>71 | hsa-miR-603    | Endogenous<br>1 | 20 | 20 | 20 | 20 | 126 | 20 | 20 | 20 |
| MIMAT00032<br>72 | hsa-miR-604    | Endogenous<br>1 | 20 | 20 | 20 | 20 | 20  | 20 | 20 | 20 |
| MIMAT00032<br>73 | hsa-miR-605-5p | Endogenous<br>1 | 20 | 32 | 26 | 20 | 28  | 30 | 20 | 20 |
| MIMAT00032<br>74 | hsa-miR-606    | Endogenous<br>1 | 26 | 40 | 20 | 20 | 20  | 20 | 20 | 20 |
| MIMAT00032<br>75 | hsa-miR-607    | Endogenous<br>1 | 20 | 30 | 29 | 25 | 26  | 47 | 28 | 20 |
| MIMAT00032<br>76 | hsa-miR-608    | Endogenous<br>1 | 34 | 20 | 25 | 20 | 29  | 26 | 21 | 20 |
| MIMAT00032<br>78 | hsa-miR-610    | Endogenous<br>1 | 20 | 29 | 32 | 20 | 35  | 20 | 20 | 45 |
| MIMAT00032<br>80 | hsa-miR-612    | Endogenous<br>1 | 55 | 76 | 72 | 41 | 68  | 59 | 45 | 38 |
| MIMAT00032<br>81 | hsa-miR-613    | Endogenous<br>1 | 28 | 33 | 22 | 24 | 41  | 21 | 23 | 20 |
| MIMAT00032<br>82 | hsa-miR-614    | Endogenous<br>1 | 20 | 41 | 20 | 26 | 35  | 24 | 21 | 20 |
| MIMAT00032<br>83 | hsa-miR-615-3p | Endogenous<br>1 | 26 | 30 | 38 | 25 | 53  | 34 | 20 | 26 |
| MIMAT00048<br>04 | hsa-miR-615-5p | Endogenous<br>1 | 20 | 36 | 26 | 20 | 28  | 23 | 20 | 24 |

|              |                |              |    |    |    |    |     |    |     |     |
|--------------|----------------|--------------|----|----|----|----|-----|----|-----|-----|
| MIMAT0004805 | hsa-miR-616-3p | Endogenous 1 | 20 | 20 | 20 | 25 | 25  | 24 | 20  | 20  |
| MIMAT0003286 | hsa-miR-617    | Endogenous 1 | 25 | 28 | 20 | 20 | 36  | 20 | 20  | 30  |
| MIMAT0003288 | hsa-miR-619-3p | Endogenous 1 | 25 | 31 | 25 | 20 | 26  | 20 | 20  | 20  |
| MIMAT0003289 | hsa-miR-620    | Endogenous 1 | 20 | 25 | 27 | 24 | 23  | 20 | 20  | 20  |
| MIMAT0004807 | hsa-miR-624-3p | Endogenous 1 | 20 | 32 | 20 | 20 | 20  | 21 | 34  | 20  |
| MIMAT0003294 | hsa-miR-625-5p | Endogenous 1 | 28 | 71 | 33 | 57 | 55  | 79 | 90  | 25  |
| MIMAT0003295 | hsa-miR-626    | Endogenous 1 | 25 | 20 | 22 | 25 | 25  | 39 | 24  | 29  |
| MIMAT0026623 | hsa-miR-627-3p | Endogenous 1 | 36 | 38 | 27 | 34 | 44  | 44 | 23  | 20  |
| MIMAT0003296 | hsa-miR-627-5p | Endogenous 1 | 20 | 20 | 20 | 20 | 322 | 20 | 20  | 20  |
| MIMAT0003297 | hsa-miR-628-3p | Endogenous 1 | 20 | 30 | 20 | 25 | 27  | 26 | 43  | 34  |
| MIMAT0004809 | hsa-miR-628-5p | Endogenous 1 | 32 | 33 | 20 | 36 | 71  | 67 | 185 | 20  |
| MIMAT0004810 | hsa-miR-629-5p | Endogenous 1 | 32 | 38 | 20 | 20 | 29  | 22 | 35  | 20  |
| MIMAT0003299 | hsa-miR-630    | Endogenous 1 | 37 | 78 | 20 | 55 | 52  | 35 | 28  | 376 |
| MIMAT0003300 | hsa-miR-631    | Endogenous 1 | 20 | 26 | 20 | 20 | 30  | 20 | 20  | 20  |
| MIMAT0003307 | hsa-miR-637    | Endogenous 1 | 21 | 22 | 20 | 20 | 27  | 20 | 20  | 20  |

|              |                 |              |    |    |    |    |     |    |    |    |
|--------------|-----------------|--------------|----|----|----|----|-----|----|----|----|
| MIMAT0003308 | hsa-miR-638     | Endogenous 1 | 27 | 31 | 22 | 29 | 32  | 25 | 20 | 20 |
| MIMAT0003309 | hsa-miR-639     | Endogenous 1 | 20 | 34 | 22 | 25 | 37  | 24 | 67 | 20 |
| MIMAT0003310 | hsa-miR-640     | Endogenous 1 | 20 | 20 | 21 | 20 | 30  | 21 | 20 | 20 |
| MIMAT0003311 | hsa-miR-641     | Endogenous 1 | 25 | 37 | 23 | 24 | 44  | 21 | 20 | 20 |
| MIMAT0020924 | hsa-miR-642a-3p | Endogenous 1 | 31 | 44 | 36 | 24 | 113 | 27 | 35 | 24 |
| MIMAT0003312 | hsa-miR-642a-5p | Endogenous 1 | 84 | 45 | 23 | 24 | 51  | 43 | 27 | 20 |
| MIMAT0003313 | hsa-miR-643     | Endogenous 1 | 20 | 20 | 20 | 22 | 31  | 20 | 20 | 20 |
| MIMAT0003314 | hsa-miR-644a    | Endogenous 1 | 62 | 42 | 29 | 60 | 141 | 56 | 23 | 25 |
| MIMAT0003318 | hsa-miR-648     | Endogenous 1 | 29 | 66 | 31 | 41 | 50  | 33 | 30 | 20 |
| MIMAT0003319 | hsa-miR-649     | Endogenous 1 | 24 | 35 | 20 | 27 | 28  | 24 | 20 | 20 |
| MIMAT0003320 | hsa-miR-650     | Endogenous 1 | 20 | 30 | 20 | 20 | 26  | 20 | 20 | 20 |
| MIMAT0025463 | hsa-miR-6503-3p | Endogenous 1 | 20 | 29 | 20 | 20 | 28  | 20 | 20 | 20 |
| MIMAT0025462 | hsa-miR-6503-5p | Endogenous 1 | 28 | 32 | 29 | 37 | 29  | 30 | 29 | 33 |
| MIMAT0026624 | hsa-miR-651-3p  | Endogenous 1 | 20 | 28 | 20 | 20 | 28  | 20 | 20 | 20 |
| MIMAT0003321 | hsa-miR-651-5p  | Endogenous 1 | 30 | 35 | 34 | 20 | 84  | 31 | 63 | 20 |



|                  |                               |                 |     |     |    |    |    |     |      |     |
|------------------|-------------------------------|-----------------|-----|-----|----|----|----|-----|------|-----|
| MIMAT00049<br>52 | hsa-miR-665                   | Endogenous<br>1 | 24  | 20  | 20 | 20 | 23 | 22  | 20   | 20  |
| MIMAT00048<br>19 | hsa-miR-671-3p                | Endogenous<br>1 | 20  | 23  | 31 | 20 | 34 | 22  | 20   | 56  |
| MIMAT00038<br>80 | hsa-miR-671-5p                | Endogenous<br>1 | 20  | 20  | 20 | 20 | 20 | 20  | 20   | 20  |
| MIMAT00258<br>51 | hsa-miR-6720-3p               | Endogenous<br>1 | 20  | 20  | 20 | 20 | 21 | 20  | 20   | 20  |
| MIMAT00258<br>52 | hsa-miR-6721-5p               | Endogenous<br>1 | 101 | 115 | 57 | 79 | 76 | 68  | 70   | 28  |
| MIMAT00258<br>56 | hsa-miR-6724-5p               | Endogenous<br>1 | 28  | 177 | 28 | 38 | 62 | 23  | 36   | 20  |
| MIMAT00042<br>84 | hsa-miR-675-5p                | Endogenous<br>1 | 20  | 20  | 20 | 20 | 21 | 20  | 20   | 20  |
| MIMAT00002<br>52 | hsa-miR-7-5p                  | Endogenous<br>1 | 66  | 25  | 41 | 43 | 32 | 343 | 743  | 20  |
| MIMAT00049<br>26 | hsa-miR-708-5p                | Endogenous<br>1 | 20  | 29  | 21 | 21 | 20 | 20  | 1780 | 60  |
| MIMAT00049<br>45 | hsa-miR-744-5p                | Endogenous<br>1 | 25  | 35  | 33 | 37 | 49 | 51  | 42   | 20  |
| MIMAT00038<br>79 | hsa-miR-758-3p+hsa-miR-411-3p | Endogenous<br>1 | 76  | 20  | 20 | 28 | 31 | 45  | 81   | 222 |
| MIMAT00229<br>29 | hsa-miR-758-5p                | Endogenous<br>1 | 20  | 20  | 20 | 20 | 20 | 20  | 20   | 20  |
| MIMAT00049<br>57 | hsa-miR-760                   | Endogenous<br>1 | 20  | 32  | 24 | 22 | 26 | 20  | 24   | 20  |
| MIMAT00103<br>64 | hsa-miR-761                   | Endogenous<br>1 | 32  | 43  | 23 | 20 | 23 | 20  | 22   | 20  |
| MIMAT00103<br>67 | hsa-miR-764                   | Endogenous<br>1 | 20  | 29  | 33 | 36 | 55 | 33  | 22   | 26  |



|                  |                |                 |     |     |     |     |     |     |     |     |
|------------------|----------------|-----------------|-----|-----|-----|-----|-----|-----|-----|-----|
| MIMAT00039<br>45 | hsa-miR-765    | Endogenous<br>1 | 20  | 32  | 21  | 22  | 26  | 30  | 20  | 20  |
| MIMAT00038<br>88 | hsa-miR-766-3p | Endogenous<br>1 | 20  | 37  | 47  | 28  | 37  | 45  | 111 | 20  |
| MIMAT00227<br>14 | hsa-miR-766-5p | Endogenous<br>1 | 20  | 20  | 20  | 20  | 20  | 20  | 20  | 20  |
| MIMAT00038<br>83 | hsa-miR-767-3p | Endogenous<br>1 | 20  | 20  | 20  | 20  | 27  | 20  | 20  | 31  |
| MIMAT00038<br>82 | hsa-miR-767-5p | Endogenous<br>1 | 20  | 30  | 21  | 20  | 35  | 22  | 42  | 20  |
| MIMAT00038<br>87 | hsa-miR-769-3p | Endogenous<br>1 | 25  | 21  | 20  | 40  | 40  | 44  | 57  | 20  |
| MIMAT00038<br>86 | hsa-miR-769-5p | Endogenous<br>1 | 155 | 115 | 408 | 487 | 165 | 282 | 787 | 335 |
| MIMAT00039<br>48 | hsa-miR-770-5p | Endogenous<br>1 | 35  | 31  | 26  | 33  | 40  | 44  | 22  | 20  |
| MIMAT00041<br>85 | hsa-miR-802    | Endogenous<br>1 | 25  | 32  | 31  | 22  | 36  | 28  | 27  | 29  |
| MIMAT00227<br>17 | hsa-miR-873-3p | Endogenous<br>1 | 103 | 134 | 60  | 97  | 62  | 64  | 86  | 71  |
| MIMAT00049<br>53 | hsa-miR-873-5p | Endogenous<br>1 | 20  | 39  | 20  | 20  | 31  | 22  | 128 | 21  |
| MIMAT00049<br>11 | hsa-miR-874-3p | Endogenous<br>1 | 20  | 26  | 25  | 20  | 34  | 24  | 21  | 20  |
| MIMAT00267<br>18 | hsa-miR-874-5p | Endogenous<br>1 | 22  | 26  | 36  | 21  | 40  | 20  | 33  | 122 |
| MIMAT00049<br>23 | hsa-miR-875-3p | Endogenous<br>1 | 29  | 30  | 29  | 21  | 21  | 23  | 20  | 26  |
| MIMAT00049<br>25 | hsa-miR-876-3p | Endogenous<br>1 | 20  | 36  | 20  | 20  | 32  | 20  | 37  | 20  |

|                  |                 |                 |     |    |     |           |     |           |            |      |
|------------------|-----------------|-----------------|-----|----|-----|-----------|-----|-----------|------------|------|
| MIMAT00049<br>24 | hsa-miR-876-5p  | Endogenous<br>1 | 20  | 20 | 20  | 20        | 32  | 27        | 54         | 20   |
| MIMAT00049<br>49 | hsa-miR-877-5p  | Endogenous<br>1 | 20  | 20 | 20  | 33        | 38  | 21        | 37         | 20   |
| MIMAT00049<br>48 | hsa-miR-885-3p  | Endogenous<br>1 | 20  | 20 | 20  | 20        | 20  | 20        | 20         | 20   |
| MIMAT00049<br>47 | hsa-miR-885-5p  | Endogenous<br>1 | 27  | 26 | 20  | 304       | 32  | 20        | 179        | 21   |
| MIMAT00049<br>51 | hsa-miR-887-3p  | Endogenous<br>1 | 20  | 26 | 20  | 20        | 33  | 20        | 24         | 27   |
| MIMAT00267<br>20 | hsa-miR-887-5p  | Endogenous<br>1 | 48  | 49 | 30  | 38        | 55  | 50        | 44         | 24   |
| MIMAT00049<br>16 | hsa-miR-888-5p  | Endogenous<br>1 | 39  | 38 | 33  | 57        | 86  | 75        | 36         | 31   |
| MIMAT00049<br>21 | hsa-miR-889-3p  | Endogenous<br>1 | 228 | 20 | 20  | 20        | 29  | 20        | 63         | 88   |
| MIMAT00049<br>12 | hsa-miR-890     | Endogenous<br>1 | 20  | 30 | 20  | 22        | 26  | 28        | 20         | 30   |
| MIMAT00049<br>02 | hsa-miR-891a-5p | Endogenous<br>1 | 28  | 35 | 26  | 20        | 43  | 33        | 29         | 42   |
| MIMAT00049<br>13 | hsa-miR-891b    | Endogenous<br>1 | 35  | 20 | 33  | 20        | 33  | 28        | 20         | 43   |
| MIMAT00049<br>07 | hsa-miR-892a    | Endogenous<br>1 | 24  | 37 | 45  | 23        | 28  | 31        | 22         | 24   |
| MIMAT00049<br>18 | hsa-miR-892b    | Endogenous<br>1 | 20  | 25 | 20  | 20        | 22  | 29        | 20         | 20   |
| MIMAT00004<br>41 | hsa-miR-9-5p    | Endogenous<br>1 | 80  | 35 | 800 | 1304<br>3 | 720 | 1456<br>6 | 21050<br>0 | 7698 |
| MIMAT00049<br>72 | hsa-miR-922     | Endogenous<br>1 | 27  | 49 | 29  | 31        | 39  | 31        | 28         | 24   |

|                  |                  |                 |      |     |      |      |      |           |       |      |
|------------------|------------------|-----------------|------|-----|------|------|------|-----------|-------|------|
| MIMAT00049<br>74 | hsa-miR-924      | Endogenous<br>1 | 20   | 30  | 20   | 20   | 25   | 20        | 20    | 20   |
| MIMAT00045<br>07 | hsa-miR-92a-1-5p | Endogenous<br>1 | 33   | 32  | 23   | 21   | 41   | 49        | 42    | 20   |
| MIMAT00000<br>92 | hsa-miR-92a-3p   | Endogenous<br>1 | 140  | 49  | 64   | 372  | 609  | 710       | 786   | 57   |
| MIMAT00032<br>18 | hsa-miR-92b-3p   | Endogenous<br>1 | 29   | 20  | 43   | 134  | 161  | 164       | 1030  | 165  |
| MIMAT00000<br>93 | hsa-miR-93-5p    | Endogenous<br>1 | 1640 | 228 | 3792 | 9344 | 5883 | 1151<br>5 | 18925 | 1401 |
| MIMAT00049<br>76 | hsa-miR-933      | Endogenous<br>1 | 27   | 36  | 23   | 23   | 44   | 27        | 27    | 20   |
| MIMAT00049<br>77 | hsa-miR-934      | Endogenous<br>1 | 20   | 31  | 20   | 20   | 33   | 23        | 20    | 20   |
| MIMAT00049<br>78 | hsa-miR-935      | Endogenous<br>1 | 20   | 28  | 26   | 20   | 20   | 20        | 20    | 20   |
| MIMAT00049<br>79 | hsa-miR-936      | Endogenous<br>1 | 22   | 42  | 23   | 20   | 30   | 29        | 20    | 20   |
| MIMAT00049<br>80 | hsa-miR-937-3p   | Endogenous<br>1 | 28   | 28  | 32   | 32   | 37   | 25        | 22    | 20   |
| MIMAT00049<br>82 | hsa-miR-939-5p   | Endogenous<br>1 | 35   | 58  | 48   | 43   | 61   | 46        | 34    | 25   |
| MIMAT00049<br>83 | hsa-miR-940      | Endogenous<br>1 | 32   | 22  | 65   | 51   | 91   | 56        | 176   | 46   |
| MIMAT00049<br>84 | hsa-miR-941      | Endogenous<br>1 | 20   | 20  | 20   | 31   | 43   | 42        | 45    | 20   |
| MIMAT00267<br>34 | hsa-miR-942-3p   | Endogenous<br>1 | 20   | 31  | 24   | 20   | 29   | 20        | 20    | 20   |
| MIMAT00049<br>85 | hsa-miR-942-5p   | Endogenous<br>1 | 22   | 25  | 20   | 22   | 40   | 37        | 21    | 20   |

|              |                |              |       |      |       |       |       |       |       |       |
|--------------|----------------|--------------|-------|------|-------|-------|-------|-------|-------|-------|
| MIMAT0004987 | hsa-miR-944    | Endogenous 1 | 58    | 34   | 34    | 20    | 42    | 24    | 23    | 25    |
| MIMAT0000094 | hsa-miR-95-3p  | Endogenous 1 | 31    | 39   | 37    | 130   | 81    | 92    | 357   | 31    |
| MIMAT0000095 | hsa-miR-96-5p  | Endogenous 1 | 31    | 22   | 132   | 340   | 285   | 35    | 29    | 20    |
| MIMAT0022842 | hsa-miR-98-3p  | Endogenous 1 | 26    | 29   | 20    | 21    | 35    | 21    | 20    | 31    |
| MIMAT0000096 | hsa-miR-98-5p  | Endogenous 1 | 604   | 174  | 194   | 1770  | 78    | 1185  | 174   | 100   |
| MIMAT0000097 | hsa-miR-99a-5p | Endogenous 1 | 7523  | 20   | 1348  | 8039  | 5369  | 6340  | 4645  | 2278  |
| MIMAT0000089 | hsa-miR-99b-5p | Endogenous 1 | 2593  | 29   | 600   | 3165  | 4819  | 4117  | 6001  | 57    |
| NM_001101.2  | ACTB           | Housekeeping | 3776  | 24   | 1216  | 3694  | 10008 | 4313  | 1664  | 293   |
| NM_004048.2  | B2M            | Housekeeping | 1952  | 20   | 306   | 2159  | 979   | 2256  | 72    | 345   |
| NM_002046.3  | GAPDH          | Housekeeping | 16916 | 51   | 2319  | 14065 | 8863  | 8386  | 2811  | 1030  |
| NM_000981.3  | RPL19          | Housekeeping | 8243  | 607  | 1426  | 5081  | 8291  | 5439  | 1756  | 513   |
| NM_001002.3  | RPLP0          | Housekeeping | 10642 | 68   | 2522  | 7104  | 11886 | 7527  | 2700  | 774   |
| nmiR00810.1  | LIG_NEG_A      | Ligation     | 20    | 21   | 23    | 20    | 23    | 20    | 20    | 25    |
| nmiR00828.1  | LIG_NEG_B      | Ligation     | 20    | 20   | 20    | 20    | 20    | 20    | 20    | 20    |
| nmiR00803.1  | LIG_NEG_C      | Ligation     | 21    | 20   | 20    | 20    | 30    | 20    | 20    | 20    |
| nmiR00813.1  | LIG_POS_A      | Ligation     | 24916 | 1428 | 17747 | 22326 | 26169 | 21332 | 18434 | 14387 |

|             |           |          |      |     |      |      |      |      |      |      |
|-------------|-----------|----------|------|-----|------|------|------|------|------|------|
| nmiR00809.1 | LIG_POS_B | Ligation | 7944 | 300 | 5487 | 6587 | 8662 | 6324 | 5268 | 3564 |
| nmiR00811.1 | LIG_POS_C | Ligation | 1244 | 537 | 924  | 1096 | 1025 | 1082 | 883  | 769  |
